# Supplementary material for: Identifying the immune interactions underlying HLA class I disease associations
Source: eLife journal article supplement (doi:10.7554/elife.54558), 2020-04-02
Supplement: app4-fig2-data2 [file elife-54558-app4-fig2-data2-v2.rds]

Archive with 1 entries (1 files):
- elife-54558-app4-fig2-data2-v2.rds.out
