# Supplementary material for: Identifying the immune interactions underlying HLA class I disease associations
Source: eLife. 2020 Apr 2;9:e54558. doi: 10.7554/eLife.54558 (PMC7253178; doi:10.7554/eLife.54558)
Supplement: Appendix 4—figure 1—source data 1. [file elife-54558-app4-fig1-data1.csv]

	A01	A02	A03	A24	B07	B08	B62	B27	B58	B44
A01	0.3461126	0.1390998	0.1014453	0.1347882	0.146005	0.1061303	0.3621937	0.06376196	0.2469586	0.02453581
A02	0.1004673	0.7103677	0.007697383	0.05836576	0.07719298	0.1522381	0.1441239	0.09901524	0.05068012	0.02512133
A03	0.0954023	0.008256881	0.5108992	0.01378214	0.01367911	0.006704981	0.05110852	0.00630137	0.0379902	0.001802451
A24	0.1070117	0.05148573	0.01073684	0.8623669	0.04588202	0.0638959	0.1276308	0.07393064	0.1277683	0.02198991
B07	0.1430831	0.09972889	0.01793824	0.0685631	0.4668914	0.2198924	0.1878163	0.1356733	0.2285001	0.01836024
B08	0.08976129	0.1754015	0.007789474	0.09585867	0.197349	0.7915709	0.1677601	0.1734661	0.06700739	0.03625464
B62	0.3366283	0.1720685	0.06329817	0.1896901	0.1884954	0.1676187	0.5286863	0.1719243	0.2876127	0.1410567
B27	0.07458663	0.1712268	0.007789474	0.1269081	0.1451125	0.207012	0.222582	0.4275596	0.09562044	0.1546292
B58	0.2160709	0.05464334	0.03534923	0.143951	0.1647825	0.05848624	0.2338855	0.05756029	0.772934	0.01421801
B44	0.0175577	0.02476943	0.001389661	0.0195122	0.01096491	0.02627907	0.0927887	0.1036245	0.009872751	0.5672575
