# Supplementary material for: Identifying the immune interactions underlying HLA class I disease associations
Source: eLife. 2020 Apr 2;9:e54558. doi: 10.7554/eLife.54558 (PMC7253178; doi:10.7554/eLife.54558)
Supplement: Appendix 4—figure 1—source data 2. [file elife-54558-app4-fig1-data2.csv]

	Intrasupertype	Intersupertype
A01	0.3461126	0.1390998
A02	0.7103677	0.008256881
A03	0.5108992	0.05148573
A24	0.8623669	0.09972889
B07	0.4668914	0.1754015
B08	0.7915709	0.1720685
B62	0.5286863	0.1712268
B27	0.4275596	0.05464334
B58	0.772934	0.02476943
B44	0.5672575	0.1004673
		0.0954023
		0.1070117
		0.1430831
		0.08976129
		0.3366283
		0.07458663
		0.2160709
		0.0175577
		0.1014453
		0.007697383
		0.01073684
		0.01793824
		0.007789474
		0.06329817
		0.007789474
		0.03534923
		0.001389661
		0.1347882
		0.05836576
		0.01378214
		0.0685631
		0.09585867
		0.1896901
		0.1269081
		0.143951
		0.0195122
		0.146005
		0.07719298
		0.01367911
		0.04588202
		0.197349
		0.1884954
		0.1451125
		0.1647825
		0.01096491
		0.1061303
		0.1522381
		0.006704981
		0.0638959
		0.2198924
		0.1676187
		0.207012
		0.05848624
		0.02627907
		0.3621937
		0.1441239
		0.05110852
		0.1276308
		0.1878163
		0.1677601
		0.06376196
		0.09901524
		0.00630137
		0.07393064
		0.1356733
		0.1734661
		0.1719243
		0.009872751
		0.05756029
		0.1036245
		0.222582
		0.2338855
		0.0927887
		0.2469586
		0.05068012
		0.0379902
		0.1277683
		0.2285001
		0.06700739
		0.2876127
		0.09562044
		0.02453581
		0.02512133
		0.001802451
		0.02198991
		0.01836024
		0.03625464
		0.1410567
		0.1546292
		0.01421801
