# Supplementary material for: Identifying the immune interactions underlying HLA class I disease associations
Source: eLife. 2020 Apr 2;9:e54558. doi: 10.7554/eLife.54558 (PMC7253178; doi:10.7554/eLife.54558)
Supplement: Appendix 4—figure 3—source data 1. [file elife-54558-app4-fig3-data1.csv]

	index_coeff	TCR.FS_coeff
A0301	-0.221067	-0.3041127
B1510	0.04372882	-0.7157676
B4901	-0.09196787	0.2629744
C0304	0.01209205	-0.05811831
C0701	-0.09760147	0.1419636
A3002	0.05048114	0.3081274
A7401	-0.1864849	-0.3524373
C0210	-0.01131069	-0.1500213
C0704	0.3136181	0.01375798
A0201	0.01651835	0.05687694
C0302	-0.2486351	-0.01770147
C1801	-0.002632207	0.3176875
B5802	0.06289122	-0.2601251
C0401	0.1646147	-0.1429412
C0602	0.01020336	-0.1073115
B0801	0.1262529	0.06155769
C0702	0.03985565	-0.1836605
A0101	-0.245298	0.1548595
B4201	0.01134862	0.1247266
B4501	0.305194	-0.04260518
C1701	0.06781868	-0.2012881
A2301	0.006542695	0.2602581
C0802	-0.1324244	-0.07113759
B0702	0.1127416	-0.03458748
B4403	-0.07693478	0.2820194
B5703	-0.4224064	-0.07914532
B8101	-0.05160099	-0.01216101
A0202	0.04669756	0.028154
B5801	-0.1130197	0.06312354
A2902	0.2046688	0.06351743
A0205	-0.1442471	0.1869775
B1402	-0.148649	-0.2772554
A3601	0.09066126	-0.1055335
C1601	0.00256417	-0.167272
A3402	-0.2447777	-0.252016
A6801	-0.1264914	-0.368012
A3301	0.03644909	-0.4661202
B1401	-0.1941873	-0.1934749
