# Supplementary material for: Identifying the immune interactions underlying HLA class I disease associations
Source: eLife. 2020 Apr 2;9:e54558. doi: 10.7554/eLife.54558 (PMC7253178; doi:10.7554/eLife.54558)
Supplement: Appendix 4—figure 3—source data 2. [file elife-54558-app4-fig3-data2.csv]

	index_coeff	near_coeff
A6802	0.05023056	0.5105616
B1510	0.04372882	0.4654587
B4901	-0.09196787	-0.2660116
C0304	0.01209205	-0.02455987
C0701	-0.09760147	0.1247438
A3002	0.05048114	0.1888889
A7401	-0.1864849	1.082881
B1503	-0.01955328	0.5221855
B1801	0.3340818	0.5002945
C0210	-0.01131069	-0.03462699
C0704	0.3136181	-0.01110726
A0201	0.01651835	0.1369859
C0302	-0.2486351	0.000805506
C1801	-0.002632207	0.201876
A6601	0.2978646	0.9714903
B5802	0.06289122	-0.1427745
C0401	0.1646147	-0.05857453
C0602	0.01020336	-0.09340253
B0801	0.1262529	0.3291124
C0702	0.03985565	-0.04524241
A0101	-0.245298	0.02181304
A3001	0.02757307	0.5149201
B4201	0.01134862	0.5177338
B4501	0.305194	0.02633611
C1701	0.06781868	0.06465914
A2301	0.006542695	0.3267017
C0802	-0.1324244	-0.05570234
B0702	0.1127416	0.4444176
B5703	-0.4224064	-0.04114228
B8101	-0.05160099	0.5208589
A0202	0.04669756	0.1821146
B5801	-0.1130197	0.03513233
A2902	0.2046688	0.5008054
A0205	-0.1442471	0.5219378
B1402	-0.148649	0.5254562
A3601	0.09066126	0.4899124
C1601	0.00256417	-0.1120533
A3402	-0.2447777	0.1898745
A6801	-0.1264914	0.5219434
B3501	-0.1076449	0.4359793
A3301	0.03644909	0.517651
B1401	-0.1941873	0.522181
