# Supplementary material for: Identifying the immune interactions underlying HLA class I disease associations
Source: eLife. 2020 Apr 2;9:e54558. doi: 10.7554/eLife.54558 (PMC7253178; doi:10.7554/eLife.54558)
Supplement: Appendix 4—figure 3—source data 3. [file elife-54558-app4-fig3-data3.csv]

	index_coeff	near_coeff
A0301	-0.221067	1.768945
A6802	0.05023056
B1510	0.04372882
C0304	0.01209205	-0.1242073
C0701	-0.09760147	-0.02400833
A3002	0.05048114	0.4955799
A7401	-0.1864849	2.726153
B1503	-0.01955328
B1801	0.3340818
C0210	-0.01131069	-0.05216669
C0704	0.3136181	-0.1696416
A0201	0.01651835	-0.2536957
C0302	-0.2486351	-0.1021608
C1801	-0.002632207	0.1457126
A6601	0.2978646	1.471027
B5802	0.06289122	-0.4173973
C0401	0.1646147	-0.007272228
C0602	0.01020336	0.002114575
B0801	0.1262529	0.4297495
C0702	0.03985565	-0.2120023
A0101	-0.245298
A3001	0.02757307
B4201	0.01134862
B4501	0.305194
C1701	0.06781868	-0.05567672
C0802	-0.1324244	-0.2311987
B0702	0.1127416
B1302	-0.03058795	-0.7435058
B4403	-0.07693478
B5703	-0.4224064	-0.3346548
B8101	-0.05160099
A0202	0.04669756	-0.4566096
B5801	-0.1130197	-0.3815681
A2902	0.2046688
A0205	-0.1442471
B1402	-0.148649
A3601	0.09066126	-0.5258795
C1601	0.00256417	-0.05639159
A3402	-0.2447777
A6801	-0.1264914
B3501	-0.1076449
A3301	0.03644909
B1401	-0.1941873
