# Supplementary material for: Identifying the immune interactions underlying HLA class I disease associations
Source: eLife. 2020 Apr 2;9:e54558. doi: 10.7554/eLife.54558 (PMC7253178; doi:10.7554/eLife.54558)
Supplement: Appendix 4—figure 3—source data 4. [file elife-54558-app4-fig3-data4.csv]

	index_coeff	near_coeff
A0301	-0.221067	0.02525029
A6802	0.05023056	-0.04453615
B1510	0.04372882	-0.6700251
B4901	-0.09196787	-0.2528836
C0304	0.01209205	-0.3944466
C0701	-0.09760147	-0.07737858
A3002	0.05048114	-0.2539826
A7401	-0.1864849	0.3548355
B1503	-0.01955328	0.1467124
B1801	0.3340818	0.1730386
C0210	-0.01131069	-0.5459304
C0704	0.3136181	0.06707464
A0201	0.01651835	0.2391595
C0302	-0.2486351	-0.3600084
C1801	-0.002632207	-0.4777042
A6601	0.2978646	-0.1695511
B5301	0.2070191	-0.1212355
B5802	0.06289122	-0.3205531
C0401	0.1646147	-0.02304854
C0602	0.01020336	-0.5318372
B0801	0.1262529	0.3867324
C0702	0.03985565	0.02253097
A0101	-0.245298	-0.2234249
A3001	0.02757307	-0.2035389
B4201	0.01134862	0.4593953
B4501	0.305194	0.2874608
C1701	0.06781868	-0.2441701
A2301	0.006542695	-0.08314642
C0802	-0.1324244	0.1790258
B0702	0.1127416	-0.5290543
B1302	-0.03058795	-0.5262905
B4403	-0.07693478	-0.2484093
B5703	-0.4224064	-0.6586062
B5101	-0.1676277	-0.2597558
B8101	-0.05160099	-0.2321115
A0202	0.04669756	0.4000645
B5801	-0.1130197	-0.4010082
A2902	0.2046688	-0.08230913
A0205	-0.1442471	0.2432904
B1402	-0.148649	-0.3234366
A3601	0.09066126	0.04034886
C1601	0.00256417	-0.3254734
A3402	-0.2447777	0.4043745
A6801	-0.1264914	0.2373377
B3501	-0.1076449	0.4546703
A3301	0.03644909	0.05829054
B1401	-0.1941873	-0.9260197
