# Supplementary material for: Identifying the immune interactions underlying HLA class I disease associations
Source: eLife. 2020 Apr 2;9:e54558. doi: 10.7554/eLife.54558 (PMC7253178; doi:10.7554/eLife.54558)
Supplement: Appendix 4—figure 3—source data 5. [file elife-54558-app4-fig3-data5.csv]

	index_coeff	near_coeff
A0301	-0.221067	-0.8857955
A6802	0.05023056	-0.3332015
B1510	0.04372882	-0.6321803
B4901	-0.09196787	-0.4115911
C0304	0.01209205	-0.3930458
C0701	-0.09760147	-0.08918822
A3002	0.05048114	-0.3865149
A7401	-0.1864849	0.4955501
B1503	-0.01955328	0.2018228
B1801	0.3340818	0.3598453
C0210	-0.01131069	-0.5899481
C0704	0.3136181	0.04642341
A0201	0.01651835	-1.269784
C0302	-0.2486351	-0.04878392
C1801	-0.002632207	-0.09381202
A6601	0.2978646	0.01746133
B5301	0.2070191	-0.2042976
B5802	0.06289122	-0.4594996
C0401	0.1646147	-0.1785469
C0602	0.01020336	-0.2230206
B0801	0.1262529	0.5274379
C0702	0.03985565	0.009012138
A0101	-0.245298	-0.8690897
A3001	0.02757307	0.1124275
B4201	0.01134862	-0.4570826
B4501	0.305194	0.2043959
C1701	0.06781868	-0.1346392
A2301	0.006542695	0.2217299
C0802	-0.1324244	-0.4881149
B0702	0.1127416	0.5130672
B1302	-0.03058795	-0.7074274
B4403	-0.07693478	-0.1688887
B5703	-0.4224064	-0.5707416
B5101	-0.1676277	-0.01203601
B8101	-0.05160099	0.250575
A0202	0.04669756	-1.257583
B5801	-0.1130197	-0.5374691
A2902	0.2046688	-1.389696
A0205	-0.1442471	-1.595669
B1402	-0.148649	-0.3683234
A3601	0.09066126	-0.0817747
C1601	0.00256417	-0.5845347
A3402	-0.2447777	-1.359988
A6801	-0.1264914	0.3290543
B3501	-0.1076449	-0.2389406
A3301	0.03644909	-0.7447153
B1401	-0.1941873	-0.619541
