# Supplementary material for: Identifying the immune interactions underlying HLA class I disease associations
Source: eLife. 2020 Apr 2;9:e54558. doi: 10.7554/eLife.54558 (PMC7253178; doi:10.7554/eLife.54558)
Supplement: Appendix 4—figure 4—source data 1. [file elife-54558-app4-fig4-data1.csv]

	index_coeff	TCR.FS_coeff
A0201	0.3580421	-0.391953
A0301	0.08638121	-0.1438477
B4901	-0.3804929	0.277182
B0702	-0.1640955	-0.3187459
C0702	-0.2193973	-0.3530111
A0101	0.2414885	-1.171213
A3201	-0.1147937	1.152368
B2705	0.06203997	0.2381947
C0202	-0.4661654	0.7364877
C0701	-0.04850842	0.4024409
B4403	-0.3250008	0.213795
C1601	0.1306163	0.781675
B4402	0.1497438	0.005973853
C0501	-0.07271879	0.3583317
B5201	0.2953083	0.7925275
B5801	0.5001557	0.17062
B1302	0.3608851	1.044931
C0602	0.3841493	-0.09554469
A1101	0.1956302	-0.1488727
B4001	-0.04150707	0.271922
B5701	0.4414029	0.008740286
C0304	0.2559922	0.7508534
A2301	-0.3633898	-0.8210593
B1501	0.5208898	-0.4593245
A3303	-0.6050487	-0.1030509
B5301	-0.45928	-0.8058745
C0401	-0.559721	-0.6180868
A2402	-0.04090639	-1.195463
B3503	-0.5090959	-0.1799339
B3501	-0.0369786	-1.635165
A2601	0.02712804	0.1985195
C1203	-0.2878632	0.7532542
A3101	-0.2214267	-0.343908
A2902	-0.6864174	-0.3009452
B5501	0.1456644	-1.414631
C0303	0.3656551	0.4063478
B5101	-0.1553613	-0.0390846
C1502	-0.4836947	0.6146419
A6801	0.1066938	-0.2110879
B1503	0.233147	0.6728895
B1402	-0.09919722	1.014882
C0802	0.3007605	0.783429
C1402	-0.0275809	-1.104669
A6601	0.4786563	-0.01473063
C1701	-0.1442218	0.9792337
C0102	0.7991905	0.6199678
A2501	0.3567622	0.000322939
B5001	0.5595538	0.2331789
A3002	-0.12963	-0.6499795
C0704	-0.4476429	-0.6987243
A6802	0.2845932	0.1429825
B4201	-0.3181548	-0.4177441
C1801	0.1335738	-1.549842
B3801	0.06947229	0.4083134
B5802	-0.3612706	0.5030587
A3301	-0.0295808	-0.3960916
B5703	0.5896723	0.6796935
A0205	-0.2890291	0.4420765
B4501	0.6598977	0.07524966
A7401	-0.4546322	-0.1574698
A0202	-0.2133989	0.3790611
B1510	0.6046073	1.010501
C0302	0.708536	0.6031148
