# Supplementary material for: Identifying the immune interactions underlying HLA class I disease associations
Source: eLife. 2020 Apr 2;9:e54558. doi: 10.7554/eLife.54558 (PMC7253178; doi:10.7554/eLife.54558)
Supplement: Appendix 4—figure 4—source data 2. [file elife-54558-app4-fig4-data2.csv]

	index_coeff	near_coeff
A0201	0.3580421	0.7323332
B4901	-0.3804929	0.08729108
B0702	-0.1640955	0.9356098
C0702	-0.2193973	0.2355157
A0101	0.2414885	-0.04901084
A3201	-0.1147937	1.317316
B0801	0.004469532	1.231195
C0202	-0.4661654	-0.4888271
C0701	-0.04850842	0.1466997
B4403	-0.3250008	0.1051835
C1601	0.1306163	1.016569
B4402	0.1497438	-0.1424601
C0501	-0.07271879	-0.644851
A3001	-0.5014625	0.3434871
B5201	0.2953083	0.1323969
B5801	0.5001557	-0.01514897
B1302	0.3608851	0.266497
C0602	0.3841493	-0.7617013
B4001	-0.04150707	-0.1081689
B5701	0.4414029	-0.1190349
C0304	0.2559922	0.7116657
A2301	-0.3633898	-0.006523785
B1501	0.5208898	1.127529
A3303	-0.6050487	1.597827
C0401	-0.559721	-0.6236887
A2402	-0.04090639	-0.4144638
B3503	-0.5090959	1.465263
B3501	-0.0369786	1.729761
A2601	0.02712804	0.1703646
B1801	-0.140405	0.3161007
C1203	-0.2878632	0.7779428
A3101	-0.2214267	1.148768
A2902	-0.6864174	1.801780
B5501	0.1456644	1.135993
C0303	0.3656551	0.4846802
C1502	-0.4836947	-0.5516248
A6801	0.1066938	0.3175659
B1503	0.233147	0.262493
B1402	-0.09919722	1.236150
C0802	0.3007605	0.8463705
C1402	-0.0275809	0.395101
A6601	0.4786563	1.127522
C1701	-0.1442218	-0.6885687
C0102	0.7991905	0.617368
A2501	0.3567622	1.130463
B5001	0.5595538	1.125444
A3002	-0.129630	1.266946
C0704	-0.4476429	0.1247208
A6802	0.2845932	0.05909754
B4201	-0.3181548	1.147845
C1801	0.1335738	-0.9822093
B5802	-0.3612706	0.2522032
A3301	-0.0295808	1.141267
B5703	0.5896723	0.2312976
A0205	-0.2890291	1.146530
B4501	0.6598977	1.336160
A7401	-0.4546322	1.157862
A0202	-0.2133989	1.152196
B1510	0.6046073	1.115062
C0302	0.708536	0.6895348
