# Supplementary material for: Identifying the immune interactions underlying HLA class I disease associations
Source: eLife. 2020 Apr 2;9:e54558. doi: 10.7554/eLife.54558 (PMC7253178; doi:10.7554/eLife.54558)
Supplement: Appendix 4—figure 4—source data 3. [file elife-54558-app4-fig4-data3.csv]

	index_coeff	near_coeff
A0201	0.3580421	15.448250
A0301	0.08638121	14.866960
B0702	-0.1640955	15.006980
C0702	-0.2193973	-0.5034505
A0101	0.2414885	15.479080
A3201	-0.1147937	15.560690
B0801	0.004469532	15.555190
B2705	0.06203997	16.155800
C0202	-0.4661654	-0.2704528
C0701	-0.04850842	-0.2317243
B4403	-0.3250008	15.582350
C1601	0.1306163	-0.1447222
B4402	0.1497438	15.548940
C0501	-0.07271879	-0.7406533
A3001	-0.5014625	-0.3048719
B5801	0.5001557	0.4708513
B1302	0.3608851	15.540110
B4001	-0.04150707	15.556030
B5701	0.4414029	0.3793371
C0304	0.2559922	-0.01901578
A2301	-0.3633898	-0.1369417
B1501	0.5208898	15.526780
A3303	-0.6050487	14.943510
C0401	-0.559721	-0.3342566
A2402	-0.04090639	0.3558048
B3503	-0.5090959	15.562750
B3501	-0.0369786	15.340610
A2601	0.02712804	15.554870
B1801	-0.140405	14.911650
C1203	-0.2878632	-0.06017932
A3101	-0.2214267	15.561980
A2902	-0.6864174	14.766120
B5501	0.1456644	15.551980
C0303	0.3656551	-0.09818958
C1502	-0.4836947	-0.4434904
A6801	0.1066938	1.395573
B1503	0.233147	15.526470
B1402	-0.09919722	15.558900
C0802	0.3007605	-0.1386855
C1402	-0.0275809	-0.1914057
A6601	0.4786563	15.534180
C1701	-0.1442218	-0.5664023
C0102	0.7991905	-0.195298
A2501	0.3567622	15.551940
B5001	0.5595538	15.539920
A3002	-0.129630	15.055250
C0704	-0.4476429	-0.2499412
A6802	0.2845932	15.528610
B4201	-0.3181548	15.578090
C1801	0.1335738	-0.5708618
B5802	-0.3612706	0.4077246
A3301	-0.0295808	15.555750
B5703	0.5896723	0.3205179
A0205	-0.2890291	15.570740
B4501	0.6598977	15.356770
A7401	-0.4546322	15.583200
A0202	-0.2133989	15.578860
B1510	0.6046073	15.510250
C0302	0.708536	-0.08465129
