# Supplementary material for: Identifying the immune interactions underlying HLA class I disease associations
Source: eLife. 2020 Apr 2;9:e54558. doi: 10.7554/eLife.54558 (PMC7253178; doi:10.7554/eLife.54558)
Supplement: Appendix 4—figure 4—source data 4. [file elife-54558-app4-fig4-data4.csv]

	index_coeff	near_coeff
A0201	0.3580421	0.156395
A0301	0.08638121	0.1525403
B4901	-0.3804929	1.048383
B0702	-0.1640955	0.2067507
C0702	-0.2193973	-0.165046
A0101	0.2414885	0.02809958
A3201	-0.1147937	0.304562
B0801	0.004469532	-0.7323617
B2705	0.06203997	-0.8964841
C0202	-0.4661654	0.8941934
C0701	-0.04850842	-0.01105534
B4403	-0.3250008	0.8145977
C1601	0.1306163	-0.4075524
B4402	0.1497438	0.2892036
C0501	-0.07271879	0.5959204
A3001	-0.5014625	0.3264228
B5201	0.2953083	0.7284334
B5801	0.5001557	0.6546239
B1302	0.3608851	0.3004034
C0602	0.3841493	1.882595
A1101	0.1956302	0.004099865
B4001	-0.04150707	0.4581833
B5701	0.4414029	0.3908676
C0304	0.2559922	1.159269
A2301	-0.3633898	0.5899032
B1501	0.5208898	0.9102505
A3303	-0.6050487	0.5670305
B5301	-0.459280	0.8564866
C0401	-0.559721	0.581296
A2402	-0.04090639	0.3489944
B3503	-0.5090959	0.5379416
B3501	-0.0369786	0.6201149
A2601	0.02712804	0.2749009
B1801	-0.140405	-0.05490321
C1203	-0.2878632	-0.0379282
A3101	-0.2214267	0.9504123
A2902	-0.6864174	0.8224444
B5501	0.1456644	0.7094879
C0303	0.3656551	0.5197533
B5101	-0.1553613	0.3102279
C1502	-0.4836947	1.504538
A6801	0.1066938	0.5305504
B1503	0.233147	-0.3242004
B1402	-0.09919722	-0.2212375
C0802	0.3007605	1.052307
C1402	-0.0275809	0.2983605
A6601	0.4786563	0.1021597
C1701	-0.1442218	-1.086524
C0102	0.7991905	-2.108213
A2501	0.3567622	0.4634646
B5001	0.5595538	0.5211063
A3002	-0.129630	0.5480672
C0704	-0.4476429	-0.06162975
A6802	0.2845932	0.2846126
B4201	-0.3181548	0.1736602
C1801	0.1335738	2.394018
B3801	0.06947229	0.2430622
B5802	-0.3612706	0.5124817
A3301	-0.0295808	0.4433652
B5703	0.5896723	0.4316266
A0205	-0.2890291	0.4300971
B4501	0.6598977	-0.08650266
A7401	-0.4546322	0.4559561
A0202	-0.2133989	0.6678902
B1510	0.6046073	-0.08083522
C0302	0.708536	-1.549108
