# Supplementary material for: Identifying the immune interactions underlying HLA class I disease associations
Source: eLife. 2020 Apr 2;9:e54558. doi: 10.7554/eLife.54558 (PMC7253178; doi:10.7554/eLife.54558)
Supplement: Appendix 4—figure 4—source data 5. [file elife-54558-app4-fig4-data5.csv]

	index_coeff	near_coeff
A0201	0.3580421	0.3181405
A0301	0.08638121	0.9786212
B4901	-0.3804929	0.3771068
B0702	-0.1640955	0.3801664
C0702	-0.2193973	-0.08703356
A0101	0.2414885	-0.5113651
A3201	-0.1147937	4.167397
B0801	0.004469532	-0.2346687
B2705	0.06203997	0.2315499
C0202	-0.4661654	0.03700656
C0701	-0.04850842	0.04961475
B4403	-0.3250008	0.5592323
C1601	0.1306163	0.6500062
B4402	0.1497438	0.6157354
C0501	-0.07271879	0.7356488
A3001	-0.5014625	2.134453
B5201	0.2953083	-0.1750336
B5801	0.5001557	-0.03480049
B1302	0.3608851	0.3542205
C0602	0.3841493	0.5075526
A1101	0.1956302	0.625523
B4001	-0.04150707	-0.2323409
B5701	0.4414029	-0.1641329
C0304	0.2559922	2.387330
A2301	-0.3633898	1.033185
B1501	0.5208898	0.1002829
A3303	-0.6050487	5.017440
B5301	-0.459280	0.7621155
C0401	-0.559721	1.308677
A2402	-0.04090639	3.280271
B3503	-0.5090959	0.003759325
B3501	-0.0369786	0.09621438
A2601	0.02712804	1.435887
B1801	-0.140405	-0.3303993
C1203	-0.2878632	-0.652366
A3101	-0.2214267	-0.1532293
A2902	-0.6864174	0.2404055
B5501	0.1456644	0.3745045
C0303	0.3656551	0.7592342
B5101	-0.1553613	-1.237127
C1502	-0.4836947	1.654852
A6801	0.1066938	-0.4107404
B1503	0.233147	-0.9530581
B1402	-0.09919722	-0.4034834
C0802	0.3007605	1.250801
C1402	-0.0275809	0.9531413
A6601	0.4786563	-0.09403643
C1701	-0.1442218	0.5920272
C0102	0.7991905	1.647102
A2501	0.3567622	3.028461
B5001	0.5595538	-0.3781348
A3002	-0.129630	0.5105825
C0704	-0.4476429	-0.002335827
A6802	0.2845932	0.3830414
B4201	-0.3181548	0.05962844
C1801	0.1335738	0.232317
B3801	0.06947229	-0.9420787
B5802	-0.3612706	-0.206772
A3301	-0.0295808	4.426594
B5703	0.5896723	-0.7864672
A0205	-0.2890291	0.9478669
B4501	0.6598977	-0.3907058
A7401	-0.4546322	1.777564
A0202	-0.2133989	0.8999392
B1510	0.6046073	-0.3105813
C0302	0.708536	0.566338
