# Supplementary material for: Identifying the immune interactions underlying HLA class I disease associations
Source: eLife. 2020 Apr 2;9:e54558. doi: 10.7554/eLife.54558 (PMC7253178; doi:10.7554/eLife.54558)
Supplement: Figure 1—source data 1. [file elife-54558-fig1-data1.csv]

proteome: HTLV-1 Uniprot accession: J02029
index	allele	TCR.FS
HLA-A02:07	HLA-A01:01	0.043478261
HLA-A02:07	HLA-A02:01	0.751552795
HLA-A02:07	HLA-A02:02	0.652173913
HLA-A02:07	HLA-A02:03	0.546583851
HLA-A02:07	HLA-A02:05	0.677018634
HLA-A02:07	HLA-A02:06	0.695652174
HLA-A02:07	HLA-A02:10	0.863354037
HLA-A02:07	HLA-A02:11	0.770186335
HLA-A02:07	HLA-A02:12	0.732919255
HLA-A02:07	HLA-A02:16	0.739130435
HLA-A02:07	HLA-A02:17	0.888198758
HLA-A02:07	HLA-A02:19	0.745341615
HLA-A02:07	HLA-A02:50	0.645962733
HLA-A02:07	HLA-A03:01	0
HLA-A02:07	HLA-A11:01	0
HLA-A02:07	HLA-A23:01	0.142857143
HLA-A02:07	HLA-A24:02	0.086956522
HLA-A02:07	HLA-A24:03	0.086956522
HLA-A02:07	HLA-A25:01	0.167701863
HLA-A02:07	HLA-A26:01	0.118012422
HLA-A02:07	HLA-A26:02	0.130434783
HLA-A02:07	HLA-A26:03	0.118012422
HLA-A02:07	HLA-A29:02	0.124223602
HLA-A02:07	HLA-A30:01	0.055900621
HLA-A02:07	HLA-A30:02	0.01863354
HLA-A02:07	HLA-A31:01	0
HLA-A02:07	HLA-A32:01	0.552795031
HLA-A02:07	HLA-A32:07	0.273291925
HLA-A02:07	HLA-A32:15	0.459627329
HLA-A02:07	HLA-A33:01	0
HLA-A02:07	HLA-A33:03	0
HLA-A02:07	HLA-A66:01	0.086956522
HLA-A02:07	HLA-A68:01	0.00621118
HLA-A02:07	HLA-A68:02	0.180124224
HLA-A02:07	HLA-A68:23	0.074534161
HLA-A02:07	HLA-A69:01	0.329192547
HLA-A02:07	HLA-A80:01	0.086956522
HLA-A02:07	HLA-B07:02	0.055900621
HLA-A02:07	HLA-B08:01	0.136645963
HLA-A02:07	HLA-B08:02	0.180124224
HLA-A02:07	HLA-B08:03	0.310559006
HLA-A02:07	HLA-B13:01	0.354037267
HLA-A02:07	HLA-B13:02	0.186335404
HLA-A02:07	HLA-B14:02	0.273291925
HLA-A02:07	HLA-B15:01	0.180124224
HLA-A02:07	HLA-B15:02	0.186335404
HLA-A02:07	HLA-B15:03	0.217391304
HLA-A02:07	HLA-B15:09	0.223602484
HLA-A02:07	HLA-B15:11	0.099378882
HLA-A02:07	HLA-B15:17	0.099378882
HLA-A02:07	HLA-B15:18	0.130434783
HLA-A02:07	HLA-B18:01	0.031055901
HLA-A02:07	HLA-B27:04	0.074534161
HLA-A02:07	HLA-B27:05	0.00621118
HLA-A02:07	HLA-B27:20	0.204968944
HLA-A02:07	HLA-B35:01	0.074534161
HLA-A02:07	HLA-B35:03	0.173913043
HLA-A02:07	HLA-B37:01	0.080745342
HLA-A02:07	HLA-B38:01	0.142857143
HLA-A02:07	HLA-B38:02	0.118012422
HLA-A02:07	HLA-B39:01	0.223602484
HLA-A02:07	HLA-B40:01	0.043478261
HLA-A02:07	HLA-B40:02	0.037267081
HLA-A02:07	HLA-B40:03	0.031055901
HLA-A02:07	HLA-B40:06	0.02484472
HLA-A02:07	HLA-B40:13	0.422360248
HLA-A02:07	HLA-B41:02	0.031055901
HLA-A02:07	HLA-B42:01	0.118012422
HLA-A02:07	HLA-B44:02	0
HLA-A02:07	HLA-B44:03	0
HLA-A02:07	HLA-B45:01	0
HLA-A02:07	HLA-B46:01	0.341614907
HLA-A02:07	HLA-B48:01	0.527950311
HLA-A02:07	HLA-B51:01	0.105590062
HLA-A02:07	HLA-B52:01	0.248447205
HLA-A02:07	HLA-B53:01	0.031055901
HLA-A02:07	HLA-B54:01	0.055900621
HLA-A02:07	HLA-B55:02	0.049689441
HLA-A02:07	HLA-B55:04	0.149068323
HLA-A02:07	HLA-B56:01	0.062111801
HLA-A02:07	HLA-B56:03	0.192546584
HLA-A02:07	HLA-B56:05	0.124223602
HLA-A02:07	HLA-B57:01	0.049689441
HLA-A02:07	HLA-B58:01	0.074534161
HLA-A02:07	HLA-B58:02	0.086956522
HLA-A02:07	HLA-B59:01	0.161490683
HLA-A02:07	HLA-B59:02	0.180124224
HLA-A02:07	HLA-B67:01	0.180124224
HLA-A02:07	HLA-B73:01	0.111801242
HLA-A02:07	HLA-B83:01	0.130434783
HLA-A02:07	HLA-C01:02	0.50931677
HLA-A02:07	HLA-C03:02	0.366459627
HLA-A02:07	HLA-C03:03	0.447204969
HLA-A02:07	HLA-C03:04	0.447204969
HLA-A02:07	HLA-C04:01	0.416149068
HLA-A02:07	HLA-C05:01	0.403726708
HLA-A02:07	HLA-C06:02	0.155279503
HLA-A02:07	HLA-C07:01	0.173913043
HLA-A02:07	HLA-C07:02	0.273291925
HLA-A02:07	HLA-C07:04	0.354037267
HLA-A02:07	HLA-C08:01	0.546583851
HLA-A02:07	HLA-C08:02	0.465838509
HLA-A02:07	HLA-C08:03	0.546583851
HLA-A02:07	HLA-C08:29	0.48447205
HLA-A02:07	HLA-C12:02	0.366459627
HLA-A02:07	HLA-C12:03	0.329192547
HLA-A02:07	HLA-C14:02	0.378881988
HLA-A02:07	HLA-C14:03	0.378881988
HLA-A02:07	HLA-C15:02	0.329192547
