# Supplementary material for: Identifying the immune interactions underlying HLA class I disease associations
Source: eLife. 2020 Apr 2;9:e54558. doi: 10.7554/eLife.54558 (PMC7253178; doi:10.7554/eLife.54558)
Supplement: Figure 2—source data 1. [file elife-54558-fig2-data1.csv]

	index_coeff	near_coeff
A2402	0.2549221	1.551956
A0207	-1.310450	-1.960639
A0206	-0.4855958	-5.369737
A3101	0.5168146	0.165941
A0201	-0.3091089	-2.466686
A3303	0.02935823	0.6711348
A2601	-0.06001286	-0.9946339
B5201	-0.2421668	-4.773345
B0702	0.4212735	1.038466
B5401	0.9190052	1.860065
B4601	-0.3938253	-1.961715
B5901	0.5721146	2.709887
B5101	0.8138428	0.6695634
B4403	-0.2322424	-0.6891998
B3501	-0.06941125	-2.774567
B4002	0.02085676	-1.429419
B5502	0.8850383	2.047093
B1501	-0.3451873	-2.232800
B4001	-0.4056222	-0.6458007
B4801	-1.136808	-2.142139
B3901	-0.7359502	-3.075322
C1202	-0.1940814	-2.620203
C0702	0.2725921	1.809698
C0102	-0.2136692	-2.415522
C1402	0.5549958	2.829675
C0401	0.7793629	2.112647
C0303	-0.053147	-1.782098
C0304	-0.654690	-1.198743
C0801	-0.4073141	-2.131528
