# Supplementary material for: Identifying the immune interactions underlying HLA class I disease associations
Source: eLife. 2020 Apr 2;9:e54558. doi: 10.7554/eLife.54558 (PMC7253178; doi:10.7554/eLife.54558)
Supplement: Figure 2—source data 2. [file elife-54558-fig2-data2.csv]

	index_coeff	near_coeff
A0207	-1.310450	-0.3242543
A0206	-0.4855958	-0.5636316
A3101	0.5168146	-0.9401404
A0201	-0.3091089	0.003125342
A3303	0.02935823	-0.6730618
A2601	-0.06001286	-0.5920311
B0702	0.4212735	-0.2936151
B5401	0.9190052	-0.7252359
B4601	-0.3938253	-1.167871
B5901	0.5721146	1.007784
B5101	0.8138428	0.4801714
B3501	-0.06941125	-0.6622184
B4002	0.02085676	-0.1517966
B5502	0.8850383	-0.5100607
B1501	-0.3451873	0.06140269
B4001	-0.4056222	-0.2597371
B4801	-1.136808	-0.3998362
B3901	-0.7359502	-0.1531156
C1202	-0.1940814	-1.881015
C0702	0.2725921	1.066698
C0102	-0.2136692	-1.551436
C1402	0.5549958	0.572145
C0401	0.7793629	-0.2223625
C0303	-0.053147	-1.563900
C0304	-0.654690	-1.076957
C0801	-0.4073141	-1.569939
