# Supplementary material for: Identifying the immune interactions underlying HLA class I disease associations
Source: eLife. 2020 Apr 2;9:e54558. doi: 10.7554/eLife.54558 (PMC7253178; doi:10.7554/eLife.54558)
Supplement: Figure 2—source data 3. [file elife-54558-fig2-data3.csv]

	index_coeff	near_coeff
A0207	-1.310450	-0.3688231
A0206	-0.4855958	-0.6007326
A3101	0.5168146	-0.9918532
A0201	-0.3091089	-0.02144534
A3303	0.02935823	-0.5418507
A2601	-0.06001286	-0.6332386
B0702	0.4212735	-0.308004
B5401	0.9190052	-0.5157334
B4601	-0.3938253	-1.235838
B5901	0.5721146	-0.08150067
B4403	-0.2322424	-0.5057746
B3501	-0.06941125	-0.7128802
B4002	0.02085676	-0.02520975
B5502	0.8850383	-0.5495526
B1501	-0.3451873	0.03949122
B4001	-0.4056222	-0.2935212
B4801	-1.136808	-0.5172052
B3901	-0.7359502	-0.1834201
C1202	-0.1940814	0.02668345
C0102	-0.2136692	-0.2710768
C1402	0.5549958	0.01853869
C0303	-0.053147	-0.1748766
C0304	-0.654690	0.1367621
C0801	-0.4073141	0.1585238
