# Supplementary material for: Identifying the immune interactions underlying HLA class I disease associations
Source: eLife. 2020 Apr 2;9:e54558. doi: 10.7554/eLife.54558 (PMC7253178; doi:10.7554/eLife.54558)
Supplement: Figure 2—source data 4. [file elife-54558-fig2-data4.csv]

	index_coeff	near_coeff
A2402	0.2549221	-0.04420299
A1101	-0.08044434	0.4969597
A0207	-1.310450	0.1195878
A0206	-0.4855958	0.9391075
A3101	0.5168146	-2.509759
A0201	-0.3091089	-0.4646318
A3303	0.02935823	-0.4251064
A2601	-0.06001286	-0.544965
B5201	-0.2421668	0.9584902
B0702	0.4212735	0.7306684
B5401	0.9190052	1.017141
B4601	-0.3938253	-0.3751234
B5901	0.5721146	3.873926
B5101	0.8138428	0.3129901
B4403	-0.2322424	4.704009
B3501	-0.06941125	-2.620003
B4002	0.02085676	0.6759883
B5502	0.8850383	6.595216
B1501	-0.3451873	-1.690869
B4001	-0.4056222	1.539005
B4801	-1.136808	3.398000
B3901	-0.7359502	-1.375037
C1202	-0.1940814	-0.3871125
C0702	0.2725921	0.718134
C0102	-0.2136692	-0.4381649
C1402	0.5549958	1.058253
C0401	0.7793629	-0.2806866
C0303	-0.053147	0.8069079
C0304	-0.654690	-2.166849
C0801	-0.4073141	-0.2457078
