# Supplementary material for: Identifying the immune interactions underlying HLA class I disease associations
Source: eLife. 2020 Apr 2;9:e54558. doi: 10.7554/eLife.54558 (PMC7253178; doi:10.7554/eLife.54558)
Supplement: Figure 2—source data 5. [file elife-54558-fig2-data5.csv]

	index_coeff	near_coeff
A2402	0.2549221	-0.3015337
A1101	-0.08044434	-0.08005876
A0207	-1.310450	0.961706
A0206	-0.4855958	0.4651045
A3101	0.5168146	1.645296
A0201	-0.3091089	-0.7347897
A3303	0.02935823	1.392193
A2601	-0.06001286	1.100552
B5201	-0.2421668	0.000335028
B0702	0.4212735	-0.2741848
B5401	0.9190052	0.1442524
B4601	-0.3938253	0.3608713
B5901	0.5721146	-2.008446
B5101	0.8138428	0.003807046
B4403	-0.2322424	0.9998405
B3501	-0.06941125	0.5553942
B4002	0.02085676	-0.3349593
B5502	0.8850383	0.716445
B1501	-0.3451873	0.3721729
B4001	-0.4056222	-0.3586217
B4801	-1.136808	2.909751
B3901	-0.7359502	0.2920799
C1202	-0.1940814	0.01392679
C0702	0.2725921	0.3898908
C0102	-0.2136692	-2.218877
C1402	0.5549958	0.06429858
C0401	0.7793629	-2.248320
C0303	-0.053147	0.1845658
C0304	-0.654690	-0.9492846
C0801	-0.4073141	-1.343595
