# Supplementary material for: Identifying the immune interactions underlying HLA class I disease associations
Source: eLife. 2020 Apr 2;9:e54558. doi: 10.7554/eLife.54558 (PMC7253178; doi:10.7554/eLife.54558)
Supplement: Figure 3—source data 1. [file elife-54558-fig3-data1.csv]

X3DS1_80_I	NK.FS.act
0.06133156	0.000000
0.1783674	0.000000
0.1969327	0.000000
0.01898882	0.000000
0.04787536	0.000000
0.05677617	0.000000
0.1296576	0.000000
0.04672749	0.000000
0.0280171	0.000000
0.008861557	0.000000
0.06867807	0.000000
1.157105	0.875000
0.1735473	0.000000
0.1056308	0.000000
0.09847916	0.000000
0.05174395	0.000000
0.01893894	0.000000
0.005515095	0.000000
0.09691934	0.000000
0.1305275	0.000000
0.1395032	0.000000
1.048005	0.9090909
0.1757673	0.000000
0.1479903	0.000000
0.09078163	0.000000
1.011342	0.9204546
0.0000474	0.000000
0.06115586	0.000000
0.07420169	0.000000
0.1597714	0.000000
1.098955	0.4431818
1.094037	0.125000
0.1722212	0.000000
0.1317168	0.000000
0.1614489	0.000000
0.1244067	0.000000
0.05684926	0.000000
0.1531871	0.000000
0.06320034	0.000000
0.09555133	0.000000
0.1718276	0.000000
1.075391	0.9204546
0.02580854	0.000000
0.172171	0.000000
0.1186925	0.000000
0.1875688	0.000000
0.07142681	0.000000
0.1810728	0.000000
0.1766861	0.000000
0.08138579	0.000000
0.1175836	0.000000
0.07642397	0.000000
1.055151	0.9204546
0.1447021	0.000000
0.01296992	0.000000
0.1620334	0.000000
0.04525213	0.000000
0.1775206	0.000000
0.1146677	0.000000
0.08141771	0.000000
0.08032979	0.000000
0.1086628	0.000000
0.1528512	0.000000
0.1736224	0.000000
0.04768954	0.000000
0.1043959	0.000000
0.02074556	0.000000
0.1616558	0.000000
0.1264867	0.000000
0.07303518	0.000000
0.1898635	0.000000
0.1423703	0.000000
0.1404665	0.000000
0.1468222	0.000000
0.1603368	0.000000
0.04139838	0.000000
0.07220589	0.000000
0.0571799	0.000000
0.1014009	0.000000
0.1774497	0.000000
0.1901295	0.000000
0.1021196	0.000000
0.07033355	0.000000
1.125784	0.9204546
0.01150954	0.000000
0.05885533	0.000000
0.128480	0.000000
0.0760411	0.000000
0.1805447	0.000000
0.1812875	0.000000
1.081103	0.125000
0.1120161	0.000000
0.06426319	0.000000
0.162145	0.000000
0.06445324	0.000000
0.1446086	0.000000
0.07485556	0.000000
1.143038	0.03409091
0.1273623	0.000000
0.1620848	0.000000
0.1611579	0.000000
0.1203685	0.000000
0.09501924	0.000000
0.07284225	0.000000
0.1883913	0.000000
0.08299518	0.000000
0.1302423	0.000000
1.199731	0.9204546
0.007871037	0.000000
0.1749353	0.000000
0.1177562	0.000000
0.02875848	0.000000
0.02887251	0.000000
0.005972875	0.000000
0.0642059	0.000000
0.09960297	0.000000
0.1102942	0.000000
0.1108315	0.000000
0.1213456	0.000000
0.09441256	0.000000
0.07946552	0.000000
1.126394	0.9204546
1.091400	0.9204546
0.09006785	0.000000
0.04036035	0.000000
0.01704908	0.000000
1.199667	0.9090909
0.145706	0.000000
0.04214079	0.000000
0.06100835	0.000000
0.04097697	0.000000
0.179706	0.000000
0.07026078	0.000000
0.1286371	0.000000
0.02955901	0.000000
0.1226957	0.000000
0.1421334	0.000000
0.03993416	0.000000
0.04916885	0.000000
0.05931139	0.000000
0.1582502	0.000000
0.03864348	0.000000
0.09724036	0.000000
0.04143841	0.000000
0.08526254	0.000000
0.06713217	0.000000
0.04777335	0.000000
0.04161882	0.000000
1.070385	0.4431818
0.1631021	0.000000
0.08598642	0.000000
0.1925248	0.000000
0.1260398	0.000000
0.05622368	0.000000
0.002490202	0.000000
0.1664094	0.000000
0.1653332	0.000000
0.0977013	0.000000
0.1730684	0.000000
0.1682554	0.000000
1.018035	0.875000
0.09888304	0.000000
0.06830204	0.000000
1.184879	0.03409091
1.084928	0.03409091
0.09742273	0.000000
1.177449	0.4431818
0.001536676	0.000000
0.1942277	0.000000
1.098111	0.875000
0.1302354	0.000000
1.115034	0.9090909
0.1082364	0.000000
1.044483	0.9204546
1.081676	0.9204546
1.118214	0.4431818
0.1329885	0.000000
0.1820502	0.000000
1.056442	0.875000
0.09856009	0.000000
0.0891519	0.000000
0.0669355	0.000000
0.1688325	0.000000
0.006429331	0.000000
0.1402871	0.000000
0.1773452	0.000000
0.06047538	0.000000
0.1777574	0.000000
0.06673335	0.000000
0.195408	0.000000
0.06578536	0.000000
0.02028367	0.000000
0.1930692	0.000000
0.02608791	0.000000
0.160741	0.000000
0.1070366	0.000000
0.04095009	0.000000
0.04426399	0.000000
0.1962875	0.000000
0.104741	0.000000
0.000958937	0.000000
0.1496951	0.000000
0.07742395	0.000000
0.1519873	0.000000
0.1443471	0.000000
0.1057235	0.000000
1.192181	0.9090909
0.1645857	0.000000
0.1339708	0.000000
0.09724016	0.000000
0.07819874	0.000000
0.1527522	0.000000
0.1770183	0.000000
0.06384195	0.000000
0.1622604	0.000000
0.1107947	0.000000
0.1037644	0.000000
0.1165156	0.000000
0.007882229	0.000000
1.067092	0.875000
0.157174	0.000000
0.1528523	0.000000
0.1033763	0.000000
0.0178747	0.000000
0.006254375	0.000000
1.005247	0.4431818
0.1759508	0.000000
0.04702714	0.000000
1.098131	0.9090909
0.05683409	0.000000
0.0256481	0.000000
1.092492	0.4431818
1.128589	0.7045454
0.05174632	0.000000
0.1857285	0.000000
0.04578625	0.000000
0.004928067	0.000000
0.1963695	0.000000
0.1234997	0.000000
0.06378666	0.000000
0.06340544	0.000000
1.073504	0.1022727
0.1513033	0.000000
0.02359398	0.000000
0.04104178	0.000000
0.06044029	0.000000
0.009357177	0.000000
0.143948	0.000000
0.05763894	0.000000
1.030927	0.875000
0.03776843	0.000000
0.1744211	0.000000
0.04969667	0.000000
1.171698	0.9090909
1.175859	0.9204546
0.01470035	0.000000
0.054140	0.000000
0.1708868	0.000000
0.02737209	0.000000
1.150735	0.4431818
0.1983871	0.000000
0.1986331	0.000000
0.03068708	0.000000
0.1192001	0.000000
0.01040255	0.000000
0.1106529	0.000000
1.063198	0.1022727
0.1840921	0.000000
0.133961	0.000000
0.1798221	0.000000
0.09245924	0.000000
1.007645	0.4431818
0.07790112	0.000000
1.149450	0.9090909
0.1381177	0.000000
0.0538797	0.000000
0.000158679	0.000000
1.052999	0.03409091
0.1559409	0.000000
0.05161321	0.000000
0.05732506	0.000000
0.04804306	0.000000
0.1149853	0.000000
0.01885838	0.000000
0.003194856	0.000000
0.121382	0.000000
0.1615425	0.000000
0.1951223	0.000000
0.1616482	0.000000
0.1720436	0.000000
0.0470658	0.000000
0.1679951	0.000000
0.07728237	0.000000
1.077972	0.9204546
0.1663962	0.000000
0.07171711	0.000000
0.01681815	0.000000
0.02056844	0.000000
1.048214	0.000000
0.01703434	0.000000
0.08798191	0.000000
1.119276	0.4431818
1.044031	0.9204546
1.199723	0.9204546
0.1416163	0.000000
0.1994916	0.000000
0.1458786	0.000000
0.1194001	0.000000
0.07421577	0.000000
0.05394924	0.000000
0.0186415	0.000000
1.115078	0.875000
0.1061779	0.000000
0.1522894	0.000000
0.1366586	0.000000
1.050570	0.125000
1.017350	0.125000
1.146554	0.125000
0.1371824	0.000000
0.01103577	0.000000
0.1925338	0.000000
0.1976605	0.000000
0.1409861	0.000000
1.087439	0.4431818
1.031618	0.9204546
1.187517	0.9204546
0.1679902	0.000000
0.04195764	0.000000
0.1510034	0.000000
0.01719959	0.000000
0.1169371	0.000000
0.04189423	0.000000
0.1858178	0.000000
0.03044493	0.000000
0.0112084	0.000000
0.1501691	0.000000
0.1268557	0.000000
0.09839061	0.000000
0.0417008	0.000000
0.04846258	0.000000
0.1594683	0.000000
0.0322683	0.000000
0.1858667	0.000000
0.09772799	0.000000
0.1800459	0.000000
0.1977099	0.000000
0.03153979	0.000000
0.1979494	0.000000
0.1749141	0.000000
0.1117864	0.000000
1.098673	0.875000
0.04439561	0.000000
0.1637118	0.000000
0.1195043	0.000000
0.1437308	0.000000
0.1898373	0.000000
0.1976355	0.000000
0.1769515	0.000000
1.122632	0.125000
0.0199956	0.000000
0.1521117	0.000000
0.01099641	0.000000
0.129210	0.000000
0.07686851	0.000000
0.1521144	0.000000
0.1618144	0.000000
0.01586199	0.000000
0.006662219	0.000000
0.06025303	0.000000
0.1752427	0.000000
0.0274016	0.000000
0.1383486	0.000000
0.02587748	0.000000
0.03307851	0.000000
0.09176439	0.000000
0.1122688	0.000000
0.1430595	0.000000
0.03530946	0.000000
1.078469	0.125000
0.1808474	0.000000
0.07213185	0.000000
0.1336516	0.000000
0.1655519	0.000000
0.08921431	0.000000
0.1596664	0.000000
0.07930865	0.000000
0.02839475	0.000000
0.08947044	0.000000
1.152007	0.4431818
0.002569952	0.000000
0.1944575	0.000000
0.1263831	0.000000
0.01125255	0.000000
0.1617924	0.000000
0.1673732	0.000000
0.1929059	0.000000
0.00090193	0.000000
0.07783515	0.000000
0.1729438	0.000000
0.03400804	0.000000
0.1005494	0.000000
1.108281	0.9090909
1.179462	0.9204546
0.1419051	0.000000
0.03684862	0.000000
0.06499793	0.000000
0.04608228	0.000000
0.00329999	0.000000
0.1523642	0.000000
0.1262614	0.000000
0.1004747	0.000000
0.1270563	0.000000
0.1282131	0.000000
0.09934495	0.000000
0.05189468	0.000000
0.1072084	0.000000
0.04984584	0.000000
0.04438086	0.000000
0.1425719	0.000000
1.125936	0.875000
0.1930459	0.000000
0.1115634	0.000000
1.075752	0.4431818
0.159015	0.000000
0.0546154	0.000000
1.159147	0.4431818
0.1922391	0.000000
0.1166672	0.000000
0.02034542	0.000000
0.1351212	0.000000
0.009008158	0.000000
1.164029	0.875000
0.1015377	0.000000
0.02601582	0.000000
0.04117499	0.000000
0.04439678	0.000000
0.09534097	0.000000
0.000786242	0.000000
0.04016032	0.000000
0.1321322	0.000000
0.1909827	0.000000
0.07195178	0.000000
0.03224063	0.000000
0.09611806	0.000000
1.195905	0.875000
0.01891551	0.000000
0.08224721	0.000000
0.03938517	0.000000
0.146539	0.000000
0.02155809	0.000000
1.048993	0.03409091
0.1716325	0.000000
1.077595	0.4431818
1.197131	0.9204546
0.1255915	0.000000
0.08150944	0.000000
0.07833152	0.000000
0.0275938	0.000000
1.185912	0.4431818
0.08299615	0.000000
0.1856367	0.000000
1.044924	0.875000
0.02720919	0.000000
1.129269	0.125000
0.05829039	0.000000
0.09228272	0.000000
0.1461654	0.000000
0.1300495	0.000000
0.08880715	0.000000
0.05391048	0.000000
0.1870662	0.000000
1.161082	0.875000
0.0267282	0.000000
0.1846507	0.000000
0.1183347	0.000000
0.1507511	0.000000
0.1956155	0.000000
0.1233194	0.000000
0.1434032	0.000000
0.02780774	0.000000
0.03660795	0.000000
0.1541588	0.000000
0.04301514	0.000000
0.09175136	0.000000
0.01362123	0.000000
0.09603404	0.000000
1.092055	0.875000
0.1606342	0.000000
0.08398658	0.000000
0.09199522	0.000000
0.04867544	0.000000
0.09347059	0.000000
0.1493107	0.000000
0.1206587	0.000000
0.1787736	0.000000
1.165454	0.9204546
0.1085184	0.000000
0.1625974	0.000000
0.1986122	0.000000
0.1341511	0.000000
0.04612091	0.000000
1.095399	0.9204546
0.1734188	0.000000
0.1014792	0.000000
0.004833814	0.000000
0.0445882	0.000000
0.03972084	0.000000
0.1644217	0.000000
0.07600186	0.000000
0.03331015	0.000000
1.043079	0.4431818
0.1740534	0.000000
1.021693	0.125000
0.1951519	0.000000
0.03654261	0.000000
1.128485	0.125000
0.1389076	0.000000
0.1876367	0.000000
0.02104888	0.000000
0.177215	0.000000
1.180015	0.03409091
0.0732501	0.000000
0.1373212	0.000000
0.1731309	0.000000
0.184946	0.000000
0.1509629	0.000000
1.065314	0.9204546
0.112860	0.000000
0.140874	0.000000
0.1926018	0.000000
0.180846	0.000000
1.189350	0.4431818
0.07014695	0.000000
0.1495886	0.000000
0.1909799	0.000000
0.009047665	0.000000
0.04570815	0.000000
0.006631292	0.000000
0.09189549	0.000000
0.1342016	0.000000
0.04789853	0.000000
1.010161	0.875000
1.006443	0.4431818
1.067499	0.125000
0.1738138	0.000000
0.1471217	0.000000
0.1135292	0.000000
0.0435054	0.000000
0.04304339	0.000000
0.0729476	0.000000
1.043940	0.4431818
0.0151781	0.000000
0.1408499	0.000000
0.108493	0.000000
0.0569488	0.000000
1.180021	0.9090909
0.06259664	0.000000
0.1658608	0.000000
0.04982039	0.000000
0.005483191	0.000000
0.1101487	0.000000
0.1620483	0.000000
1.194946	0.875000
0.07109859	0.000000
0.1490038	0.000000
0.05354476	0.000000
0.09584489	0.000000
