# Supplementary material for: Identifying the immune interactions underlying HLA class I disease associations
Source: eLife. 2020 Apr 2;9:e54558. doi: 10.7554/eLife.54558 (PMC7253178; doi:10.7554/eLife.54558)
Supplement: Figure 3—source data 2. [file elife-54558-fig3-data2.csv]

I	II	III
-0.37894	-0.16248	0.05427
I	II+III
-0.37894	-0.04493
