# Supplementary material for: Identifying the immune interactions underlying HLA class I disease associations
Source: eLife. 2020 Apr 2;9:e54558. doi: 10.7554/eLife.54558 (PMC7253178; doi:10.7554/eLife.54558)
Supplement: Figure 3—source data 3. [file elife-54558-fig3-data3.csv]

run	coeff
1	-0.464889701
2	-0.44147042
3	-0.335879758
4	-0.369439781
5	-0.405661368
6	-0.270861656
7	-0.291450975
8	-0.345925969
9	-0.368913071
10	-0.449806013
11	-0.518277699
12	-0.427807974
13	-0.414087526
14	-0.388104753
15	-0.41580541
16	-0.373436431
17	-0.315764256
18	-0.289183547
19	-0.338870686
20	-0.361275415
21	-0.332604773
22	-0.39670388
23	-0.434901895
24	-0.33394525
25	-0.445920097
26	-0.314099191
27	-0.343125252
28	-0.417122427
29	-0.439448983
30	-0.450215506
31	-0.337919149
32	-0.321972408
33	-0.429080146
34	-0.304913094
35	-0.240383623
36	-0.521857386
37	-0.401006596
38	-0.35759788
39	-0.344805745
40	-0.419931311
41	-0.397413642
42	-0.488046535
43	-0.378157749
44	-0.389148322
45	-0.42962123
46	-0.421146877
47	-0.250526808
48	-0.384791322
49	-0.429702361
50	-0.273547216
51	-0.367498201
52	-0.382977205
53	-0.405049424
54	-0.405571346
55	-0.410820207
56	-0.320062772
57	-0.348119278
58	-0.277660868
59	-0.394497132
60	-0.454178173
61	-0.405996376
62	-0.390277798
63	-0.35374947
64	-0.315875116
65	-0.369964762
66	-0.330386811
67	-0.329408108
68	-0.357640714
69	-0.423446608
70	-0.349779688
71	-0.363471552
72	-0.327588093
73	-0.333499768
74	-0.38733467
75	-0.37459065
76	-0.391526545
77	-0.391020465
78	-0.482056283
79	-0.313513222
80	-0.433912111
81	-0.299312052
82	-0.426357899
83	-0.436428334
84	-0.325114336
85	-0.266027345
86	-0.400909426
87	-0.312782044
88	-0.353924266
89	-0.343639277
90	-0.402184028
91	-0.40567885
92	-0.316198731
93	-0.438996659
94	-0.369375466
95	-0.36504675
96	-0.457141073
97	-0.299938413
98	-0.379429832
99	-0.407894491
100	-0.390627897
101	-0.337213597
102	-0.373208857
103	-0.396992981
104	-0.453638806
105	-0.383511984
106	-0.4151066
107	-0.350162016
108	-0.317928188
109	-0.358582868
110	-0.400442512
111	-0.267245514
112	-0.417864033
113	-0.445035873
114	-0.428152602
115	-0.389423727
116	-0.388526639
117	-0.386137504
118	-0.242947276
119	-0.464286961
120	-0.384703087
121	-0.395932295
122	-0.437962577
123	-0.454613211
124	-0.345869337
125	-0.339150224
126	-0.356323393
127	-0.316999205
128	-0.393264105
129	-0.372929369
130	-0.369934408
131	-0.403433084
132	-0.306291553
133	-0.450753848
134	-0.280602678
135	-0.413449655
136	-0.371798491
137	-0.372494287
138	-0.382769996
139	-0.320255568
140	-0.427154086
141	-0.275669985
142	-0.446564348
143	-0.376965998
144	-0.307774914
145	-0.492155715
146	-0.308150442
147	-0.26478368
148	-0.363434183
149	-0.262935441
150	-0.291045134
151	-0.415337819
152	-0.322944867
153	-0.378956711
154	-0.323074917
155	-0.433259871
156	-0.390811082
157	-0.315281208
158	-0.355573521
159	-0.289136601
160	-0.414804511
161	-0.441600651
162	-0.387129024
163	-0.318829461
164	-0.359246531
165	-0.329806773
166	-0.422524443
167	-0.429507866
168	-0.40952827
169	-0.372942832
170	-0.333133069
171	-0.384953129
172	-0.37684571
173	-0.333770163
174	-0.417913094
175	-0.32269917
176	-0.410248199
177	-0.372761872
178	-0.422000558
179	-0.459948841
180	-0.430378649
181	-0.437594687
182	-0.528510983
183	-0.310359467
184	-0.461516097
185	-0.258748723
186	-0.346898789
187	-0.335414893
188	-0.406203903
189	-0.462641491
190	-0.390145282
191	-0.283361603
192	-0.431365407
193	-0.489833589
194	-0.365431871
195	-0.324010916
196	-0.472098613
197	-0.343879196
198	-0.330167774
199	-0.30373492
200	-0.491607731
201	-0.337927109
202	-0.333112624
203	-0.369089117
204	-0.411633654
205	-0.362133779
206	-0.336854789
207	-0.440040331
208	-0.370365937
209	-0.315223125
210	-0.45551816
211	-0.340048448
212	-0.322656777
213	-0.472385951
214	-0.367845357
215	-0.308580359
216	-0.382759353
217	-0.416659811
218	-0.412119435
219	-0.339470469
220	-0.393501338
221	-0.365969609
222	-0.357209793
223	-0.391047194
224	-0.27310992
225	-0.331338161
226	-0.406953236
227	-0.34941186
228	-0.39071861
229	-0.380161021
230	-0.392572051
231	-0.40129616
232	-0.416882486
233	-0.455925037
234	-0.453666899
235	-0.378909814
236	-0.418851951
237	-0.301945411
238	-0.41246912
239	-0.31193946
240	-0.234941919
241	-0.436441272
242	-0.470560749
243	-0.360654173
244	-0.325635844
245	-0.373937318
246	-0.287223512
247	-0.292520884
248	-0.451458742
249	-0.487101337
250	-0.371909078
251	-0.463222079
252	-0.378316322
253	-0.394646713
254	-0.344399985
255	-0.275553153
256	-0.393859217
257	-0.376006417
258	-0.275932349
259	-0.372816575
260	-0.425472929
261	-0.439315235
262	-0.356441119
263	-0.302257137
264	-0.337543958
265	-0.34792163
266	-0.449877099
267	-0.470339817
268	-0.39077932
269	-0.398121893
270	-0.289009816
271	-0.390283969
272	-0.407982742
273	-0.334554566
274	-0.322028904
275	-0.358255023
276	-0.264539152
277	-0.39806528
278	-0.356297415
279	-0.323515596
280	-0.385044516
281	-0.484239875
282	-0.44199951
283	-0.400514689
284	-0.43001203
285	-0.400846483
286	-0.450040378
287	-0.375205064
288	-0.405940774
289	-0.385774683
290	-0.322497518
291	-0.404813322
292	-0.334722763
293	-0.383175943
294	-0.429775661
295	-0.390897676
296	-0.436949284
297	-0.396119956
298	-0.45342687
299	-0.402238015
300	-0.453231652
301	-0.343205384
302	-0.370306016
303	-0.300145336
304	-0.274421887
305	-0.300830917
306	-0.406297054
307	-0.392969325
308	-0.334769006
309	-0.351972785
310	-0.336168549
311	-0.384147489
312	-0.386460868
313	-0.447977647
314	-0.458149129
315	-0.363183936
316	-0.408544436
317	-0.419483033
318	-0.323093532
319	-0.360647957
320	-0.431668851
321	-0.414360324
322	-0.446148125
323	-0.336212647
324	-0.43546573
325	-0.31111429
326	-0.371786185
327	-0.379919146
328	-0.480284234
329	-0.377703491
330	-0.49353923
331	-0.403241153
332	-0.345086538
333	-0.425058315
334	-0.432390202
335	-0.274381005
336	-0.405992266
337	-0.453761902
338	-0.325926647
339	-0.311371827
340	-0.419130275
341	-0.434657758
342	-0.278625969
343	-0.321723614
344	-0.346247186
345	-0.324005077
346	-0.3231732
347	-0.454304243
348	-0.328154566
349	-0.440133981
350	-0.390166338
351	-0.448445833
352	-0.383503499
353	-0.306995513
354	-0.420554844
355	-0.458654163
356	-0.307642168
357	-0.423894927
358	-0.327874533
359	-0.265888049
360	-0.386927352
361	-0.315185959
362	-0.29766119
363	-0.404100095
364	-0.362106669
365	-0.46387047
366	-0.287986961
367	-0.379535705
368	-0.426944126
369	-0.437016433
370	-0.321875814
371	-0.461830845
372	-0.380568399
373	-0.355929593
374	-0.315209563
375	-0.401768008
376	-0.38913116
377	-0.362232493
378	-0.396078641
379	-0.343499146
380	-0.357715629
381	-0.418131454
382	-0.413170928
383	-0.377822868
384	-0.430799862
385	-0.403383042
386	-0.373491778
387	-0.464843458
388	-0.351067696
389	-0.346478216
390	-0.269882424
391	-0.364430158
392	-0.364073409
393	-0.319429495
394	-0.45931887
395	-0.410690884
396	-0.453770838
397	-0.381521671
398	-0.338562785
399	-0.274478157
400	-0.437658255
401	-0.400611053
402	-0.338402457
403	-0.372645458
404	-0.399201837
405	-0.350602827
406	-0.288363707
407	-0.430540281
408	-0.358041727
409	-0.363278997
410	-0.396872005
411	-0.285535807
412	-0.383446282
413	-0.335324282
414	-0.438731043
415	-0.451428226
416	-0.253177969
417	-0.451251522
418	-0.30071642
419	-0.30568829
420	-0.384702031
421	-0.332800273
422	-0.399503987
423	-0.454812702
424	-0.424416793
425	-0.359018244
426	-0.353709023
427	-0.396842638
428	-0.389260355
429	-0.332066504
430	-0.353411584
431	-0.322795715
432	-0.278922403
433	-0.268952091
434	-0.442113541
435	-0.439679641
436	-0.338054468
437	-0.358601651
438	-0.299257676
439	-0.381362302
440	-0.422813278
441	-0.33855077
442	-0.39053586
443	-0.378413007
444	-0.36391165
445	-0.360591364
446	-0.373958747
447	-0.299931554
448	-0.349863855
449	-0.367599993
450	-0.357131211
451	-0.289855653
452	-0.342473735
453	-0.29219636
454	-0.462795295
455	-0.369703815
456	-0.456903881
457	-0.415712811
458	-0.420905077
459	-0.401203862
460	-0.398664948
461	-0.364596362
462	-0.39831957
463	-0.316744682
464	-0.224945495
465	-0.301137543
466	-0.395432951
467	-0.312845222
468	-0.452722906
469	-0.308898134
470	-0.30757035
471	-0.359626374
472	-0.353903143
473	-0.447762896
474	-0.316306678
475	-0.334249643
476	-0.433590919
477	-0.324718164
478	-0.290135219
479	-0.453687507
480	-0.378300616
481	-0.365050243
482	-0.356037471
483	-0.341470364
484	-0.363104079
485	-0.322214268
486	-0.42398116
487	-0.297201945
488	-0.382633959
489	-0.410882195
490	-0.394100934
491	-0.472714879
492	-0.411267744
493	-0.351297491
494	-0.349269045
495	-0.247708213
496	-0.429898707
497	-0.349830494
498	-0.264303208
499	-0.361972212
500	-0.258707804
501	-0.405724015
502	-0.430109672
503	-0.348301525
504	-0.280847464
505	-0.319136682
506	-0.378890915
507	-0.392928348
508	-0.415977318
509	-0.259226334
510	-0.341363128
511	-0.307482745
512	-0.447627273
513	-0.385081491
514	-0.487061564
515	-0.34657125
516	-0.376523402
517	-0.374130134
518	-0.363205355
519	-0.414557356
520	-0.400820541
521	-0.344390158
522	-0.376023715
523	-0.412222158
524	-0.460536956
525	-0.374899654
526	-0.371824548
527	-0.37741561
528	-0.423266268
529	-0.47505898
530	-0.32851534
531	-0.447753312
532	-0.262652451
533	-0.424728922
534	-0.397859332
535	-0.342195705
536	-0.317156027
537	-0.479933797
538	-0.339960484
539	-0.316191911
540	-0.4081363
541	-0.32724465
542	-0.454503875
543	-0.459610437
544	-0.439383997
545	-0.312479554
546	-0.418117779
547	-0.408273075
548	-0.481229205
549	-0.264901072
550	-0.413761562
551	-0.387864652
552	-0.480961412
553	-0.266944935
554	-0.475119317
555	-0.392360083
556	-0.348268092
557	-0.347676829
558	-0.397837989
559	-0.387580265
560	-0.371258416
561	-0.335749471
562	-0.377974188
563	-0.33914529
564	-0.455950377
565	-0.353066446
566	-0.378083558
567	-0.299879101
568	-0.293538071
569	-0.422469217
570	-0.291839965
571	-0.397826453
572	-0.374088045
573	-0.336505099
574	-0.41872706
575	-0.397346431
576	-0.432936012
577	-0.388011123
578	-0.371353094
579	-0.409405273
580	-0.361407334
581	-0.326409084
582	-0.468309805
583	-0.309355583
584	-0.384413558
585	-0.305550178
586	-0.259209987
587	-0.394186784
588	-0.31928932
589	-0.329127807
590	-0.336075357
591	-0.328423827
592	-0.353058563
593	-0.467571506
594	-0.343267771
595	-0.414800006
596	-0.307863092
597	-0.31181727
598	-0.324101662
599	-0.372215966
600	-0.344086059
601	-0.362424188
602	-0.313729135
603	-0.348746006
604	-0.312925304
605	-0.407249167
606	-0.308582719
607	-0.430041232
608	-0.317278
609	-0.416812116
610	-0.495634346
611	-0.407454899
612	-0.278456446
613	-0.369952856
614	-0.345996536
615	-0.442334089
616	-0.434058763
617	-0.412051192
618	-0.392558958
619	-0.325319481
620	-0.456241742
621	-0.30073051
622	-0.422758491
623	-0.473869824
624	-0.369398926
625	-0.371966351
626	-0.33473423
627	-0.393134919
628	-0.301494618
629	-0.332395229
630	-0.298431725
631	-0.430115672
632	-0.339372039
633	-0.422181888
634	-0.407271575
635	-0.395650041
636	-0.452970701
637	-0.428778358
638	-0.328992015
639	-0.415197795
640	-0.386171373
641	-0.288737923
642	-0.355429271
643	-0.390772205
644	-0.320407875
645	-0.465756748
646	-0.497414374
647	-0.435372863
648	-0.35819709
649	-0.320340849
650	-0.430847617
651	-0.390700272
652	-0.378214441
653	-0.399063866
654	-0.284563975
655	-0.478763497
656	-0.479237781
657	-0.361492731
658	-0.336954944
659	-0.391560713
660	-0.264393353
661	-0.423023388
662	-0.332162556
663	-0.286262882
664	-0.401391942
665	-0.460655256
666	-0.466137769
667	-0.488699521
668	-0.375172108
669	-0.397131351
670	-0.437772197
671	-0.393386983
672	-0.311648997
673	-0.458905517
674	-0.417040186
675	-0.365350504
676	-0.38987685
677	-0.314827289
678	-0.516238747
679	-0.345999776
680	-0.409402678
681	-0.357309306
682	-0.386110161
683	-0.443252177
684	-0.508099655
685	-0.329176834
686	-0.321793371
687	-0.413520592
688	-0.399749045
689	-0.44896251
690	-0.404970969
691	-0.340774361
692	-0.423972102
693	-0.314273051
694	-0.391353395
695	-0.361852713
696	-0.362268989
697	-0.398818049
698	-0.359888786
699	-0.395022908
700	-0.309074847
701	-0.391529133
702	-0.362206149
703	-0.405818471
704	-0.371275904
705	-0.364228319
706	-0.212343087
707	-0.383244614
708	-0.417572091
709	-0.326117376
710	-0.256431658
711	-0.363706034
712	-0.390260702
713	-0.475677424
714	-0.427157087
715	-0.335194396
716	-0.277118593
717	-0.363741808
718	-0.341349107
719	-0.32623364
720	-0.303507248
721	-0.400999513
722	-0.28537078
723	-0.294318198
724	-0.400443661
725	-0.375577277
726	-0.325950896
727	-0.351811344
728	-0.436841514
729	-0.414712102
730	-0.2846248
731	-0.41622672
732	-0.455831736
733	-0.404464208
734	-0.28690798
735	-0.315224748
736	-0.255961839
737	-0.424764316
738	-0.270148832
739	-0.369653368
740	-0.380414918
741	-0.38752339
742	-0.390941618
743	-0.421265171
744	-0.40312578
745	-0.433551276
746	-0.348056973
747	-0.410681731
748	-0.301534499
749	-0.412703382
750	-0.3806216
751	-0.370198178
752	-0.32085368
753	-0.409252892
754	-0.42129022
755	-0.459155447
756	-0.488144695
757	-0.440692239
758	-0.448167115
759	-0.393130464
760	-0.397292837
761	-0.370091994
762	-0.485258249
763	-0.356030608
764	-0.419262139
765	-0.276208855
766	-0.269033773
767	-0.414414915
768	-0.417765708
769	-0.421188261
770	-0.475466681
771	-0.446142506
772	-0.454378632
773	-0.33019373
774	-0.371745594
775	-0.270419725
776	-0.42535383
777	-0.457256831
778	-0.347089761
779	-0.399231248
780	-0.303025248
781	-0.412292465
782	-0.360307707
783	-0.420639112
784	-0.35992939
785	-0.364365082
786	-0.45139496
787	-0.394655896
788	-0.364149761
789	-0.311048301
790	-0.384593586
791	-0.51162431
792	-0.428998881
793	-0.287143301
794	-0.374090692
795	-0.415191703
796	-0.389548608
797	-0.396908539
798	-0.48424681
799	-0.468716738
800	-0.465608898
801	-0.36247587
802	-0.381296178
803	-0.367076524
804	-0.295001621
805	-0.360195636
806	-0.388783502
807	-0.337551199
808	-0.369825673
809	-0.334947323
810	-0.379277891
811	-0.393084035
812	-0.38187314
813	-0.381771446
814	-0.36171213
815	-0.324774642
816	-0.420118379
817	-0.368173429
818	-0.313203915
819	-0.415646673
820	-0.364088724
821	-0.418539554
822	-0.419790309
823	-0.423819205
824	-0.407466869
825	-0.349870559
826	-0.409913813
827	-0.408507337
828	-0.433324062
829	-0.491611264
830	-0.305222123
831	-0.276337549
832	-0.435355192
833	-0.373132681
834	-0.468848769
835	-0.375232564
836	-0.31335423
837	-0.414543656
838	-0.234986724
839	-0.429489483
840	-0.434556821
841	-0.354900967
842	-0.488751339
843	-0.439076317
844	-0.318928923
845	-0.311944252
846	-0.303455649
847	-0.472947328
848	-0.418695251
849	-0.363094175
850	-0.354978211
851	-0.422299215
852	-0.295630427
853	-0.33202165
854	-0.278671113
855	-0.307589842
856	-0.310636752
857	-0.338258087
858	-0.480727281
859	-0.348573805
860	-0.404854059
861	-0.307762813
862	-0.430876977
863	-0.37404244
864	-0.39088998
865	-0.412768765
866	-0.444955784
867	-0.374970518
868	-0.301503089
869	-0.350157767
870	-0.424488664
871	-0.366513148
872	-0.423837851
873	-0.387910495
874	-0.392634066
875	-0.34201383
876	-0.469189054
877	-0.286787165
878	-0.352281783
879	-0.313463021
880	-0.444589055
881	-0.424240611
882	-0.380054365
883	-0.277794206
884	-0.377615581
885	-0.356270098
886	-0.459210066
887	-0.453163865
888	-0.503950167
889	-0.40115086
890	-0.373882883
891	-0.435062277
892	-0.48227703
893	-0.388883723
894	-0.420116578
895	-0.295649054
896	-0.348373452
897	-0.334094334
898	-0.45222025
899	-0.386336259
900	-0.467556412
901	-0.373961
902	-0.383827618
903	-0.283501652
904	-0.362745868
905	-0.421907271
906	-0.43749659
907	-0.419592661
908	-0.29708145
909	-0.372011521
910	-0.329095978
911	-0.428009475
912	-0.416151806
913	-0.380398909
914	-0.365363457
915	-0.198319544
916	-0.474909915
917	-0.403061501
918	-0.388665628
919	-0.433926196
920	-0.426072588
921	-0.449240258
922	-0.4520612
923	-0.41551578
924	-0.292791316
925	-0.318305982
926	-0.321603774
927	-0.330691078
928	-0.41437339
929	-0.37955191
930	-0.332667167
931	-0.410617783
932	-0.220858224
933	-0.366424337
934	-0.376723505
935	-0.367737274
936	-0.380726272
937	-0.427901153
938	-0.399881164
939	-0.434729161
940	-0.414635122
941	-0.396760955
942	-0.485821871
943	-0.351502521
944	-0.465553501
945	-0.370426481
946	-0.279937123
947	-0.391590619
948	-0.41815123
949	-0.348264175
950	-0.409233323
951	-0.43053936
952	-0.371911081
953	-0.441385032
954	-0.383222508
955	-0.474343325
956	-0.486967179
957	-0.438369125
958	-0.330121338
959	-0.404744438
960	-0.368340011
961	-0.306347202
962	-0.423703139
963	-0.438261358
964	-0.30708675
965	-0.453214037
966	-0.301052423
967	-0.42159118
968	-0.333094443
969	-0.422956051
970	-0.378375913
971	-0.402348301
972	-0.428278836
973	-0.424194078
974	-0.364414079
975	-0.400525174
976	-0.270064397
977	-0.288190535
978	-0.431297452
979	-0.309987607
980	-0.304335065
981	-0.397506381
982	-0.355327156
983	-0.421309758
984	-0.483933836
985	-0.332273395
986	-0.352001305
987	-0.435432044
988	-0.411652848
989	-0.443049774
990	-0.391716351
991	-0.447415007
992	-0.355813807
993	-0.423979039
994	-0.386781398
995	-0.430337976
996	-0.330103147
997	-0.358903656
998	-0.444389758
999	-0.427406409
1000	-0.306608051
1001	-0.406799642
1002	-0.314773892
1003	-0.437846656
1004	-0.466738483
1005	-0.488850177
1006	-0.403129319
1007	-0.429242931
1008	-0.311181495
1009	-0.404023675
1010	-0.379100682
1011	-0.48457544
1012	-0.398221389
1013	-0.434519185
1014	-0.367261743
1015	-0.367849398
1016	-0.460854731
1017	-0.34163902
1018	-0.350693839
1019	-0.344550647
1020	-0.322413261
1021	-0.330539515
1022	-0.440362683
1023	-0.348579741
1024	-0.388760458
1025	-0.430506365
1026	-0.428269079
1027	-0.302730518
1028	-0.34183734
1029	-0.351713703
1030	-0.317327806
1031	-0.401128526
1032	-0.349140585
1033	-0.355730178
1034	-0.401096019
1035	-0.440820275
1036	-0.393674428
1037	-0.433660251
1038	-0.338834376
1039	-0.410682359
1040	-0.371993017
1041	-0.384986105
1042	-0.246768318
1043	-0.38765982
1044	-0.285853479
1045	-0.349540198
1046	-0.343376229
1047	-0.326211393
1048	-0.381450186
1049	-0.383703597
1050	-0.41122966
1051	-0.317277339
1052	-0.377186642
1053	-0.472518421
1054	-0.325558948
1055	-0.323774016
1056	-0.474174755
1057	-0.382952661
1058	-0.387163302
1059	-0.382159594
1060	-0.393695359
1061	-0.354644175
1062	-0.41761141
1063	-0.326811004
1064	-0.377014901
1065	-0.384176858
1066	-0.332195031
1067	-0.374388961
1068	-0.372350699
1069	-0.351605433
1070	-0.35215383
1071	-0.45083322
1072	-0.423503285
1073	-0.410513617
1074	-0.360582898
1075	-0.349842813
1076	-0.447785755
1077	-0.292346665
1078	-0.292424834
1079	-0.442688662
1080	-0.320102236
1081	-0.266344545
1082	-0.357995194
1083	-0.412341092
1084	-0.299291947
1085	-0.397081936
1086	-0.371993421
1087	-0.358422624
1088	-0.316162898
1089	-0.395842433
1090	-0.467865094
1091	-0.358709443
1092	-0.289222115
1093	-0.402432056
1094	-0.50660456
1095	-0.346748151
1096	-0.405387817
1097	-0.326227109
1098	-0.415158141
1099	-0.315875972
1100	-0.319622678
1101	-0.418370728
1102	-0.310330176
1103	-0.328040624
1104	-0.349530526
1105	-0.494444365
1106	-0.443898965
1107	-0.305962011
1108	-0.439498843
1109	-0.394018447
1110	-0.419156031
1111	-0.429749814
1112	-0.269618075
1113	-0.453425649
1114	-0.298229462
1115	-0.43559618
1116	-0.341849838
1117	-0.42255758
1118	-0.268765873
1119	-0.394671075
1120	-0.367007914
1121	-0.290260488
1122	-0.457207267
1123	-0.251864466
1124	-0.464572452
1125	-0.374662175
1126	-0.456473657
1127	-0.318257773
1128	-0.378880701
1129	-0.401834546
1130	-0.369840245
1131	-0.319040765
1132	-0.369333174
1133	-0.355310912
1134	-0.386710387
1135	-0.262015907
1136	-0.382124779
1137	-0.424479775
1138	-0.329766505
1139	-0.457740734
1140	-0.402755217
1141	-0.354107073
1142	-0.37332403
1143	-0.280629775
1144	-0.390702814
1145	-0.438920726
1146	-0.414863525
1147	-0.395617963
1148	-0.453312073
1149	-0.294949302
1150	-0.303546109
1151	-0.490791104
1152	-0.364602174
1153	-0.382389912
1154	-0.440245315
1155	-0.424263848
1156	-0.450164579
1157	-0.388060558
1158	-0.385087472
1159	-0.41484312
1160	-0.505201289
1161	-0.343021713
1162	-0.492928307
1163	-0.468655294
1164	-0.4153561
1165	-0.326216389
1166	-0.414645125
1167	-0.357490984
1168	-0.428810277
1169	-0.432972517
1170	-0.285983989
1171	-0.437970042
1172	-0.381784378
1173	-0.393999013
1174	-0.370539602
1175	-0.356616336
1176	-0.432371581
1177	-0.424334032
1178	-0.394160179
1179	-0.367695548
1180	-0.355021356
1181	-0.354896234
1182	-0.361709229
1183	-0.414638875
1184	-0.369004349
1185	-0.427218311
1186	-0.360334108
1187	-0.384228742
1188	-0.414880413
1189	-0.345024971
1190	-0.411906958
1191	-0.3770563
1192	-0.371070569
1193	-0.433844799
1194	-0.473169863
1195	-0.296314533
1196	-0.414254387
1197	-0.44841207
1198	-0.371522023
1199	-0.349635084
1200	-0.386945373
1201	-0.406552195
1202	-0.433245248
1203	-0.440343906
1204	-0.388608723
1205	-0.324752769
1206	-0.332934943
1207	-0.426780472
1208	-0.436292536
1209	-0.363545135
1210	-0.287475942
1211	-0.248578489
1212	-0.326198212
1213	-0.295498788
1214	-0.304218826
1215	-0.332453087
1216	-0.307429628
1217	-0.293467734
1218	-0.49162034
1219	-0.398382707
1220	-0.441611531
1221	-0.420860602
1222	-0.247546023
1223	-0.424853151
1224	-0.385492671
1225	-0.390086866
1226	-0.435362206
1227	-0.419733846
1228	-0.486112932
1229	-0.433100171
1230	-0.402507903
1231	-0.401782155
1232	-0.336920179
1233	-0.373274028
1234	-0.394777168
1235	-0.34459667
1236	-0.423913467
1237	-0.38596233
1238	-0.438921499
1239	-0.334806364
1240	-0.338317823
1241	-0.379604262
1242	-0.495423021
1243	-0.475173318
1244	-0.435283111
1245	-0.398571459
1246	-0.312264284
1247	-0.392519188
1248	-0.393887586
1249	-0.258194513
1250	-0.36146449
1251	-0.315247709
1252	-0.41201128
1253	-0.344305002
1254	-0.282215264
1255	-0.361262002
1256	-0.382414698
1257	-0.381489483
1258	-0.447617009
1259	-0.468207915
1260	-0.432603045
1261	-0.346982576
1262	-0.4104016
1263	-0.325290482
1264	-0.369129669
1265	-0.425431836
1266	-0.440554722
1267	-0.420831149
1268	-0.361094427
1269	-0.403837655
1270	-0.416901338
1271	-0.294552401
1272	-0.387021967
1273	-0.444593447
1274	-0.386760644
1275	-0.378143359
1276	-0.420199148
1277	-0.349242416
1278	-0.5274345
1279	-0.340872031
1280	-0.462907833
1281	-0.40708621
1282	-0.411631509
1283	-0.447895726
1284	-0.448618618
1285	-0.405294877
1286	-0.37438732
1287	-0.384180743
1288	-0.452583618
1289	-0.3649774
1290	-0.44503128
1291	-0.375633794
1292	-0.323720459
1293	-0.373540074
1294	-0.452096279
1295	-0.398332926
1296	-0.38229062
1297	-0.33178946
1298	-0.420464895
1299	-0.437273101
1300	-0.370224462
1301	-0.442288527
1302	-0.370258664
1303	-0.415947991
1304	-0.443761404
1305	-0.379633168
1306	-0.369844423
1307	-0.369397593
1308	-0.422934286
1309	-0.292814731
1310	-0.342552048
1311	-0.335327738
1312	-0.393127973
1313	-0.414799504
1314	-0.355521895
1315	-0.438169559
1316	-0.385551234
1317	-0.342312061
1318	-0.393381218
1319	-0.447769586
1320	-0.424000286
1321	-0.316824579
1322	-0.334739179
1323	-0.339566715
1324	-0.465990758
1325	-0.381505735
1326	-0.34594564
1327	-0.380778344
1328	-0.435348273
1329	-0.496976645
1330	-0.301059012
1331	-0.360907551
1332	-0.448231567
1333	-0.448517329
1334	-0.229688976
1335	-0.327020201
1336	-0.326725219
1337	-0.479234522
1338	-0.341048804
1339	-0.402197495
1340	-0.408455943
1341	-0.430923613
1342	-0.379053307
1343	-0.451754229
1344	-0.364949528
1345	-0.37897743
1346	-0.423168326
1347	-0.293059261
1348	-0.419057644
1349	-0.356046051
1350	-0.3162341
1351	-0.339947658
1352	-0.409020053
1353	-0.355954251
1354	-0.323352481
1355	-0.411876418
1356	-0.480349373
1357	-0.428340624
1358	-0.381749549
1359	-0.452850496
1360	-0.383787578
1361	-0.463651917
1362	-0.358673119
1363	-0.430383551
1364	-0.376006778
1365	-0.364579621
1366	-0.286130746
1367	-0.340005543
1368	-0.39237611
1369	-0.465151323
1370	-0.346555147
1371	-0.480658971
1372	-0.323340309
1373	-0.337365668
1374	-0.438867552
1375	-0.322383129
1376	-0.430495996
1377	-0.457377846
1378	-0.424033853
1379	-0.36100127
1380	-0.397761337
1381	-0.354962166
1382	-0.373500382
1383	-0.314598394
1384	-0.432498108
1385	-0.409449479
1386	-0.487445956
1387	-0.411410507
1388	-0.460980904
1389	-0.456184905
1390	-0.375117601
1391	-0.271408111
1392	-0.407452314
1393	-0.359971211
1394	-0.408867329
1395	-0.48255902
1396	-0.238615015
1397	-0.439060846
1398	-0.468817704
1399	-0.370361959
1400	-0.32360664
1401	-0.399808797
1402	-0.442143969
1403	-0.356744032
1404	-0.464272303
1405	-0.455265811
1406	-0.359641317
1407	-0.429748419
1408	-0.368590718
1409	-0.405358551
1410	-0.399487179
1411	-0.443032446
1412	-0.400749265
1413	-0.381653712
1414	-0.459410192
1415	-0.395325714
1416	-0.47934614
1417	-0.30272869
1418	-0.268244747
1419	-0.42449984
1420	-0.387095506
1421	-0.328943661
1422	-0.361771441
1423	-0.299262542
1424	-0.424374678
1425	-0.423070097
1426	-0.437501813
1427	-0.382352027
1428	-0.318807582
1429	-0.298036366
1430	-0.387746669
1431	-0.363386393
1432	-0.461519754
1433	-0.426150413
1434	-0.396707328
1435	-0.484746142
1436	-0.444802356
1437	-0.423808985
1438	-0.368351497
1439	-0.292181123
1440	-0.339401426
1441	-0.441864926
1442	-0.3384427
1443	-0.429196739
1444	-0.422748136
1445	-0.321969
1446	-0.51206
1447	-0.512309323
1448	-0.287254679
1449	-0.474702285
1450	-0.409337962
1451	-0.31911145
1452	-0.465612525
1453	-0.423818772
1454	-0.349832868
1455	-0.475884239
1456	-0.365437312
1457	-0.408058163
1458	-0.427522596
1459	-0.267956086
1460	-0.346723533
1461	-0.457947946
1462	-0.415413476
1463	-0.418414636
1464	-0.356424742
1465	-0.426182711
1466	-0.478687409
1467	-0.366694813
1468	-0.416793763
1469	-0.467734821
1470	-0.438855071
1471	-0.329017073
1472	-0.3959992
1473	-0.441450513
1474	-0.323809395
1475	-0.396596691
1476	-0.395178376
1477	-0.397183258
1478	-0.435142913
1479	-0.412066503
1480	-0.438225099
1481	-0.393605764
1482	-0.297175939
1483	-0.373702766
1484	-0.452105732
1485	-0.38360475
1486	-0.343660882
1487	-0.267470298
1488	-0.365308982
1489	-0.387293006
1490	-0.400123456
1491	-0.42103649
1492	-0.353547093
1493	-0.34244983
1494	-0.347212819
1495	-0.38253273
1496	-0.303249954
1497	-0.370427639
1498	-0.484382913
1499	-0.407496792
1500	-0.477062016
1501	-0.419188426
1502	-0.435840841
1503	-0.409776193
1504	-0.259893717
1505	-0.325998156
1506	-0.322272475
1507	-0.294879824
1508	-0.355691015
1509	-0.4728517
1510	-0.396704246
1511	-0.335152622
1512	-0.372132929
1513	-0.426023538
1514	-0.436398042
1515	-0.423008579
1516	-0.399616687
1517	-0.420728753
1518	-0.384771896
1519	-0.416823714
1520	-0.372823323
1521	-0.365575066
1522	-0.432735008
1523	-0.376702235
1524	-0.27438016
1525	-0.358177114
1526	-0.395468227
1527	-0.474084503
1528	-0.438587073
1529	-0.392340008
1530	-0.30847768
1531	-0.437755159
1532	-0.312803544
1533	-0.355764988
1534	-0.446859762
1535	-0.456429964
1536	-0.3794427
1537	-0.294959291
1538	-0.360489076
1539	-0.422769376
1540	-0.312490229
1541	-0.384663812
1542	-0.37243747
1543	-0.293542764
1544	-0.365549966
1545	-0.368586218
1546	-0.427330237
1547	-0.470206776
1548	-0.343674313
1549	-0.38143042
1550	-0.428315066
1551	-0.41616515
1552	-0.450318562
1553	-0.386996568
1554	-0.405733189
1555	-0.422973861
1556	-0.29953401
1557	-0.429128787
1558	-0.308627459
1559	-0.381733473
1560	-0.275614457
1561	-0.410079319
1562	-0.381335984
1563	-0.446634563
1564	-0.438869862
1565	-0.399254178
1566	-0.327407502
1567	-0.365933929
1568	-0.376417313
1569	-0.413508275
1570	-0.355306414
1571	-0.36754285
1572	-0.228339876
1573	-0.463374208
1574	-0.375299677
1575	-0.375819014
1576	-0.404005623
1577	-0.349760464
1578	-0.432927631
1579	-0.46077222
1580	-0.45980873
1581	-0.370697772
1582	-0.391808802
1583	-0.259623855
1584	-0.347745526
1585	-0.425664949
1586	-0.431021269
1587	-0.434510219
1588	-0.284916392
1589	-0.291246395
1590	-0.354276299
1591	-0.458642896
1592	-0.473782267
1593	-0.348811416
1594	-0.360029822
1595	-0.346419579
1596	-0.382073238
1597	-0.424674611
1598	-0.318750321
1599	-0.435558189
1600	-0.377896907
1601	-0.396584266
1602	-0.336534116
1603	-0.35955845
1604	-0.380663005
1605	-0.396256843
1606	-0.279981961
1607	-0.357007788
1608	-0.370260833
1609	-0.401339646
1610	-0.416698902
1611	-0.199159006
1612	-0.403622114
1613	-0.34924744
1614	-0.416250455
1615	-0.349778407
1616	-0.420489795
1617	-0.443520581
1618	-0.314364071
1619	-0.370138821
1620	-0.310086199
1621	-0.335578077
1622	-0.428307411
1623	-0.325138487
1624	-0.467686153
1625	-0.315754346
1626	-0.501143346
1627	-0.332973177
1628	-0.273467313
1629	-0.359810506
1630	-0.309938542
1631	-0.317244761
1632	-0.430296572
1633	-0.398073318
1634	-0.363821148
1635	-0.352777574
1636	-0.335929664
1637	-0.393948741
1638	-0.500619642
1639	-0.350497464
1640	-0.334118645
1641	-0.48886533
1642	-0.421440271
1643	-0.364387184
1644	-0.450297899
1645	-0.357769466
1646	-0.361300321
1647	-0.320351674
1648	-0.322188104
1649	-0.367917722
1650	-0.385972719
1651	-0.36932235
1652	-0.322769994
1653	-0.301061562
1654	-0.42658734
1655	-0.392087112
1656	-0.330364439
1657	-0.384420554
1658	-0.377140576
1659	-0.39236879
1660	-0.379566623
1661	-0.387784809
1662	-0.316834209
1663	-0.377107899
1664	-0.403133971
1665	-0.343126892
1666	-0.3493108
1667	-0.446076517
1668	-0.369622245
1669	-0.280002506
1670	-0.426652739
1671	-0.400615007
1672	-0.41683262
1673	-0.340795986
1674	-0.447470836
1675	-0.415773251
1676	-0.377895245
1677	-0.410845795
1678	-0.389037144
1679	-0.407728361
1680	-0.38649678
1681	-0.447352594
1682	-0.424758723
1683	-0.332641916
1684	-0.29193524
1685	-0.396247327
1686	-0.408326427
1687	-0.380022708
1688	-0.381661112
1689	-0.350185118
1690	-0.505829478
1691	-0.351278282
1692	-0.431826851
1693	-0.383468053
1694	-0.369641534
1695	-0.354997957
1696	-0.301624666
1697	-0.319251105
1698	-0.287107553
1699	-0.413763564
1700	-0.393071608
1701	-0.4257977
1702	-0.275364136
1703	-0.374622409
1704	-0.383555448
1705	-0.434545638
1706	-0.288323746
1707	-0.357841219
1708	-0.365717933
1709	-0.451757224
1710	-0.473011443
1711	-0.471407886
1712	-0.366311078
1713	-0.444779992
1714	-0.301940175
1715	-0.327035157
1716	-0.451823322
1717	-0.199759725
1718	-0.422711955
1719	-0.333342753
1720	-0.380413511
1721	-0.287887921
1722	-0.350079199
1723	-0.363167297
1724	-0.421459181
1725	-0.415585731
1726	-0.314364511
1727	-0.452869725
1728	-0.387223052
1729	-0.470161843
1730	-0.386433681
1731	-0.399066436
1732	-0.381476811
1733	-0.41332952
1734	-0.404496135
1735	-0.380850933
1736	-0.347716123
1737	-0.407805793
1738	-0.328833782
1739	-0.343522907
1740	-0.250792823
1741	-0.487152783
1742	-0.415580119
1743	-0.40775416
1744	-0.336741942
1745	-0.445752005
1746	-0.365396706
1747	-0.440749935
1748	-0.347409685
1749	-0.383670112
1750	-0.438165698
1751	-0.350696292
1752	-0.365343479
1753	-0.435120609
1754	-0.285003077
1755	-0.375496016
1756	-0.352651984
1757	-0.350567932
1758	-0.380973025
1759	-0.316950682
1760	-0.327780547
1761	-0.373036517
1762	-0.496645784
1763	-0.445417832
1764	-0.486032776
1765	-0.430000012
1766	-0.334821092
1767	-0.38434516
1768	-0.30209056
1769	-0.396213943
1770	-0.340584797
1771	-0.434674869
1772	-0.322580932
1773	-0.377184929
1774	-0.450291706
1775	-0.409282596
1776	-0.454797045
1777	-0.421407859
1778	-0.389329707
1779	-0.438794075
1780	-0.410346208
1781	-0.388051297
1782	-0.332117685
1783	-0.266505912
1784	-0.447303218
1785	-0.435088539
1786	-0.369387288
1787	-0.338715158
1788	-0.482277033
1789	-0.327845226
1790	-0.381301755
1791	-0.474454962
1792	-0.479589168
1793	-0.329486949
1794	-0.394666631
1795	-0.432481553
1796	-0.416559572
1797	-0.375771986
1798	-0.34699377
1799	-0.294631233
1800	-0.372911065
1801	-0.344381141
1802	-0.364940114
1803	-0.521993511
1804	-0.479369388
1805	-0.371744698
1806	-0.347717287
1807	-0.419203294
1808	-0.412910821
1809	-0.422175899
1810	-0.276428633
1811	-0.238749183
1812	-0.365167149
1813	-0.32694186
1814	-0.461745859
1815	-0.480608149
1816	-0.417207362
1817	-0.411968644
1818	-0.376360614
1819	-0.307711819
1820	-0.429720986
1821	-0.484422136
1822	-0.456544139
1823	-0.326912318
1824	-0.381100134
1825	-0.368775108
1826	-0.304124713
1827	-0.387644487
1828	-0.418028516
1829	-0.388233138
1830	-0.345500693
1831	-0.413610985
1832	-0.323373112
1833	-0.286652281
1834	-0.441385305
1835	-0.404715831
1836	-0.2809521
1837	-0.35100096
1838	-0.313965339
1839	-0.424172713
1840	-0.499130046
1841	-0.470400354
1842	-0.409260871
1843	-0.367263849
1844	-0.372790663
1845	-0.305364818
1846	-0.331116733
1847	-0.384696703
1848	-0.289159361
1849	-0.419703345
1850	-0.322695217
1851	-0.460166098
1852	-0.423909094
1853	-0.337425164
1854	-0.302932304
1855	-0.425968319
1856	-0.309579176
1857	-0.429158824
1858	-0.300707317
1859	-0.392885488
1860	-0.386682758
1861	-0.410199568
1862	-0.399830044
1863	-0.288212612
1864	-0.247046385
1865	-0.411925486
1866	-0.294826407
1867	-0.366669293
1868	-0.454305022
1869	-0.355468086
1870	-0.435071713
1871	-0.42349011
1872	-0.42567541
1873	-0.391015712
1874	-0.343815506
1875	-0.415013584
1876	-0.38537376
1877	-0.363409154
1878	-0.366145249
1879	-0.372332622
1880	-0.401012194
1881	-0.344105966
1882	-0.450823907
1883	-0.410355459
1884	-0.376622222
1885	-0.389798546
1886	-0.374925723
1887	-0.331408472
1888	-0.334615117
1889	-0.399225915
1890	-0.310100448
1891	-0.309958815
1892	-0.509159669
1893	-0.420013306
1894	-0.37913419
1895	-0.364901064
1896	-0.460855097
1897	-0.360230701
1898	-0.428733
1899	-0.347683719
1900	-0.406333346
1901	-0.285035319
1902	-0.416221912
1903	-0.379665358
1904	-0.374507731
1905	-0.353724346
1906	-0.347858341
1907	-0.491889765
1908	-0.269449446
1909	-0.37707054
1910	-0.404750983
1911	-0.422947609
1912	-0.38449857
1913	-0.23163818
1914	-0.296235832
1915	-0.477707224
1916	-0.373772038
1917	-0.400444442
1918	-0.448968303
1919	-0.322829442
1920	-0.4875253
1921	-0.360973202
1922	-0.37372022
1923	-0.369155693
1924	-0.380962611
1925	-0.441234128
1926	-0.421931923
1927	-0.278057907
1928	-0.390700794
1929	-0.341959386
1930	-0.434715552
1931	-0.403149022
1932	-0.38473451
1933	-0.439744922
1934	-0.3015735
1935	-0.323229181
1936	-0.387936588
1937	-0.311340375
1938	-0.338790779
1939	-0.406670125
1940	-0.355232602
1941	-0.3995626
1942	-0.31706037
1943	-0.359386671
1944	-0.267393993
1945	-0.174512824
1946	-0.418937702
1947	-0.379887791
1948	-0.361067709
1949	-0.375716201
1950	-0.433479068
1951	-0.308820913
1952	-0.429057163
1953	-0.421821979
1954	-0.430142344
1955	-0.501743663
1956	-0.340973386
1957	-0.296081757
1958	-0.478107331
1959	-0.460526635
1960	-0.396168801
1961	-0.513722861
1962	-0.341759405
1963	-0.38196624
1964	-0.328126843
1965	-0.33377775
1966	-0.393658199
1967	-0.384849828
1968	-0.396349548
1969	-0.432436846
1970	-0.299069501
1971	-0.267306016
1972	-0.372965103
1973	-0.49468615
1974	-0.423135331
1975	-0.284760272
1976	-0.353739209
1977	-0.371359204
1978	-0.450012133
1979	-0.482512203
1980	-0.391465781
1981	-0.345278985
1982	-0.425853518
1983	-0.321130439
1984	-0.439549804
1985	-0.390444067
1986	-0.314298031
1987	-0.340780828
1988	-0.278441059
1989	-0.358840965
1990	-0.384093931
1991	-0.418649021
1992	-0.433295816
1993	-0.33267581
1994	-0.290491186
1995	-0.431833387
1996	-0.377452813
1997	-0.376146095
1998	-0.37665068
1999	-0.340876755
[truncated: 3,001 more rows]
